1           **Dietary fat promotes antibiotic-induced *Clostridioides difficile***  
2                                           **mortality in mice**

3   **Authors:** Keith Z. Hazleton<sup>1,2,#</sup>, Casey G. Martin<sup>3</sup>, David J Orlicky<sup>4</sup>, Kathleen L. Arnolds<sup>3</sup>,  
4 Nichole M. Nusbacher<sup>5</sup>, Nancy Moreno-Huizar<sup>5</sup>, Michael Armstrong<sup>6</sup>, Nichole Reisdorph<sup>6</sup>,  
5 Catherine A. Lozupone<sup>5\*</sup>

6  
7   **Affiliations:**

8   <sup>1</sup> Department of Pediatrics, Section of Gastroenterology, Hepatology and Nutrition. University of  
9 Colorado, Denver Anschutz Medical Campus, Aurora, CO USA 80045.

10 <sup>2</sup>Digestive Health Institute, Children's Hospital Colorado, Aurora, CO USA 80045.

11 <sup>#</sup> Current address, Department of Pediatrics, Division of Gastroenterology, Hepatology and  
12 Nutrition, University of Arizona, Tucson, AZ 85719

13 <sup>3</sup> Department of Immunology and Microbiology, University of Colorado, Denver Anschutz  
14 Medical Campus, Aurora, CO USA 80045.

15 <sup>4</sup> Department of Pathology, University of Colorado, Denver Anschutz Medical Campus, Aurora,  
16 CO USA 80045.

17 <sup>5</sup> Department of Medicine, Division of Biomedical Informatics and Personalized Medicine,  
18 University of Colorado, Denver Anschutz Medical Campus, Aurora, CO USA 80045.

19 <sup>6</sup> Skaggs School of Pharmacy and Pharmaceutical Sciences, University of Colorado Anschutz  
20 Medical Campus, Aurora, CO USA 80045.

21 \*To whom correspondence should be addressed: [Catherine.Lozaupone@cuanschutz.edu](mailto:Catherine.Lozaupone@cuanschutz.edu)

22  
23  
24   **One Sentence Summary:** A high-fat/low-fiber Western type diet promoted mortality in a mouse  
25 model of antibiotic-induced *C. difficile* infection compared to a low-fat/low-fiber diet and chow  
26 diet, suggesting that lower dietary fat may be an effective strategy for preventing *C. difficile*  
27 pathology.

28

29 **Abstract:** *Clostridioides difficile* infection (CDI), is the leading cause of hospital-acquired  
30 diarrhea and emerging evidence has linked dietary components with CDI pathogenesis,  
31 suggesting that dietary modulation may be an effective strategy for prevention. Here, we show  
32 that mice fed a high-fat/low-fiber “Western type” diet (WD) had dramatically increased mortality  
33 in a murine model of antibiotic-induced CDI compared to a low-fat/low-fiber (LF/LF) diet and  
34 standard mouse chow controls. We found that the WD had a pro- *C. difficile* bile acid  
35 composition that was driven in part by higher levels of primary bile acids that are produced to  
36 digest fat, and a lower level of secondary bile acids that are produced by the gut microbiome.  
37 This lack of secondary bile acids was associated with a greater disturbance to the gut  
38 microbiome with antibiotics in both the WD and LF/LF diet compared to mouse chow. Mice fed  
39 the WD also had the highest level of toxin TcdA just prior to the onset of mortality, but not of  
40 TcdB or increased inflammation. These findings indicate that dietary intervention to decrease fat  
41 may complement previously proposed dietary intervention strategies to prevent CDI in high-risk  
42 individuals.

43

44

45

46 **Keywords:** gut microbiome, western diet, bile acids, short chain fatty acids, *Clostridioides*  
47 *difficile* infection

## 48 **Introduction**

49 *Clostridioides difficile* infection (CDI) is an important cause of morbidity and mortality,  
50 with 500,000 cases every year causing 30,000 deaths per year in the US alone<sup>1</sup>. Alarminglly,  
51 there has been a steady increase in the number of new infections in spite of prevention efforts in  
52 hospitals that have focused largely on increased sanitation and antibiotic stewardship<sup>2</sup>. *C.*  
53 *difficile* induced pathology has been linked to the production of two different toxins, TcdA and  
54 TcdB, which can directly induce intestinal damage and inflammation<sup>3</sup>.

55 A complex gut microbiome is protective against CDI<sup>4</sup>. Illnesses associated with reduced  
56 gut microbiome diversity, such as inflammatory bowel disease<sup>5</sup> increase risk of CDI, as does  
57 broad spectrum antibiotic usage, such as clindamycin, beta-lactams, and fluoroquinolones<sup>6,7</sup>.  
58 Antibiotics have been shown to predispose mice to CDI via modified metabolic activity of the  
59 altered gut microbiome<sup>8</sup>. Individuals with recurrent CDI (rCDI) typically have microbiomes  
60 with greatly reduced complexity and altered composition<sup>9-11</sup>. The gut microbiome provides  
61 protection from CDI in part through metabolism of primary bile acids, which are excreted by the  
62 liver into the intestine where they play a central role in fat digestion<sup>12</sup>. The primary bile acids  
63 taurocholic acid (TCA) and cholic acid (CA) can promote the germination of *C. difficile* spores.  
64 However, a healthy gut microbiome can metabolize TCA and CA into the secondary bile acid  
65 deoxycholate (DCA), a derivative that can arrest the growth of vegetative *C. difficile*<sup>13</sup>.  
66 Accordingly, prior studies have shown that secondary bile acid producers such as *Clostridium*  
67 *scindens* can protect against CDI in mice<sup>14</sup>. Short chain fatty acids (SCFA), which are microbial  
68 products of fermentation of dietary microbial accessible carbohydrates (MACs; e.g. soluble  
69 fibers such as inulin), have also been shown to directly suppress *C. difficile* growth *in vitro*<sup>15</sup> and  
70 are decreased in individuals with rCDI<sup>16</sup>.

71           Recent studies conducted in mouse models of antibiotic-induced CDI have suggested that  
72 diet modulation has the potential to be an effective prevention strategy for antibiotic-induced  
73 CDI. Diets high in MACs<sup>15</sup> and low in proline<sup>4</sup> reduced *C. difficile* colonization and persistence.  
74 Excess dietary zinc reduces the threshold of antibiotics needed to confer susceptibility to CDI  
75 and increased cecal inflammation and toxin activity<sup>17</sup>. High-fat/high-protein diets<sup>18</sup> and high-fat  
76 induced obesity<sup>19</sup> resulted in more severe disease and/or increased mortality. Furthermore, mice  
77 fed a protein deficient defined diet, had increased survival, decreased weight loss, and decreased  
78 overall disease severity<sup>20</sup>.

79           Given that primary bile acids play a central role in fat digestion, increase with diets high  
80 in saturated fat<sup>21</sup> and are a germination factor for *C. difficile* spores, we became interested in  
81 investigating a role for dietary fat in antibiotic-induced CDI pathogenesis. We hypothesized that  
82 a high-fat diet coupled with low-fiber in the context of antibiotic treatment would provide a  
83 “double hit” for shifting towards a pro-*C. difficile* bile acid pool – with dietary fat increasing  
84 excretion of pro- *C. difficile* primary bile acids into the gut and increased antibiotic-induced gut  
85 microbiome disturbance decreasing their conversion into protective secondary bile acids. We  
86 found that high dietary fat content in the context of a low fiber diet (a high-fat/low-fiber Western  
87 Diet; WD) induced high mortality from CDI in an antibiotic-induced *C. difficile* model. This  
88 higher mortality was linked with higher levels of *C. difficile* toxin TcdA, but not with higher  
89 levels of TcdB or increased intestinal inflammation just prior to the onset of mortality. Bile acid  
90 pools were strongly influenced by diet to a pro-*C. difficile* composition, but more work needs to  
91 be done to determine the degree to which these differences were driving the higher mortality  
92 observed with the WD. Our work suggests that dietary interventions to decrease fat intake may

93 complement previously proposed strategies that target fiber and protein to prevent CDI in high-  
94 risk individuals.

95

## 96 **Results**

### 97 ***High dietary fat in the context of low dietary fiber causes increased mortality in murine*** 98 ***antibiotic-induced CDI***

99 To understand the effects of dietary fat on CDI, we used an established murine model of  
100 antibiotic-induced CDI<sup>22</sup>. Specifically, conventional 6-week-old old female C57BL/6 mice were  
101 fed 1 of 3 diets: 1) conventional mouse chow that is low-fat/high-fiber, 2) a purified “Western”  
102 diet (WD) that had ~2x the content of fat with increased ratio of saturated-to-unsaturated fat  
103 compared to chow and only insoluble cellulose as a source of fiber, and 3) a similar purified diet  
104 as the WD, but with a lower fat content, similar to chow (low-fat/low-fiber; LF/LF) (Table 1;  
105 Table S2). This WD composition represents a typical diet in the United States based on  
106 population survey data with 34.5% of calories from fat, with a roughly equivalent contributions  
107 of saturated (~36%), mono-unsaturated fats (41%) and a lower contribution from poly-  
108 unsaturated fats (~21%). In the LF/LF diet, these contributions are reversed (saturated fat ~19%  
109 and poly-unsaturated fat ~39%). One week after diet switch, mice were treated with a cocktail of  
110 antibiotics in their drinking water for 5 days (kanamycin, gentamicin, colistin, metronidazole and  
111 vancomycin) followed by an injection of clindamycin and gavage with *C. difficile* VPI 10463  
112 (Fig. 1A). The experiments were carried out for up to 21 days past *C. difficile* gavage, allowing  
113 us to assay effects on mortality and relate these to fecal microbiome composition. Experiments  
114 were conducted on 2 separate cohorts – 2 cages of five mice per diet, with technical replicates of  
115 mice with a total sample size of 20 per diet (Figure 1, Table S2).

116 The WD-fed mice showed a marked increase in mortality as compared to both the LF/LF  
117 (HR 7.403 p = 0.0041) and chow-fed mice (HR 4.95 p = 0.00208) upon *C. difficile* exposure.  
118 Mortality onset began at Day 4 in the WD and chow-fed mice and then continued to Day 8 in the  
119 WD and to Day 6 in the chow-fed mice before stabilizing with the remaining mice appearing to  
120 recover. The LF/LF diet-fed mice showed survival levels comparable to the chow-fed mice with  
121 a slightly delayed onset of mortality (Fig. 1B). WD-fed diet mice did not show increased weight  
122 loss compared to the other diets (Figure S1). Qualitatively, WD-fed mice had more purulent and  
123 liquid stools, and poorer grooming than LF/LF and chow-fed mice starting 2 days after infection.  
124 Because our WD and LF/LF diet differed in sucrose content, we also tested a fourth diet that was  
125 low in fat and fiber, but with sucrose equivalent to the WD (Table S1). Sucrose did not appear to  
126 play a role in the increased mortality observed in the WD, as 100% survival was observed in  
127 mice fed the low-fat/low-fiber/low-sucrose diet. (n = 10, one cage with 5 mice in two separate  
128 experiments).

### 129 ***WD associated with increased C. difficile toxin TcdA but not TcdB or intestinal inflammation***

130 To further explore the mechanisms of increased mortality in the WD-fed mice by  
131 assessing factors that required the collection of host tissues, we conducted a second set of  
132 experiments in which mice were sacrificed at day 3 post *C. difficile* gavage (cohort 2; Figure 1).  
133 We chose 3 days post *C. difficile* gavage because this was just prior to the observed onset of  
134 mortality in the first cohort across all 3 diets (Fig. 1B), and because we felt it was important to  
135 compare all mice at a standard time point.

136 We measured cecal levels of *C. difficile* Toxins A (TcdA) and B (TcdB) by ELISA (see  
137 Table S2 for cohort size and batch information). Interestingly, TcdA and not TcdB showed  
138 differences with diet consistent with mortality patterns, with TcdA being much higher in the WD

139 compared to the LF/LF diet. The LF/LF diet also had slightly lower levels of TcdA than the  
140 chow diet (Figure 2A), which is consistent with a delayed onset of mortality in the LF/LF diet  
141 compared to chow (Figure 1). To understand whether intestinal inflammation was related to  
142 toxin levels and differed between diets, we evaluated the transverse colon and cecum by  
143 histology (Fig. 2B, D). Cecal and transverse colon tissues from mice sacrificed three days post-  
144 infection with *C. difficile* were fixed and stained with hematoxylin and eosin and were scored by  
145 the Barthel and Dieleman scoring systems respectively by a trained histologist blinded to the  
146 treatments and grouping of individuals<sup>23,24</sup>. The cecum and distal colon samples showed mild to  
147 moderate inflammation, but the histologic damage did not differ across diet groups (Fig. 2B;  
148 representative histology Fig. 2D). To control for batch effects, we also assessed differences  
149 between diet groups for both toxins and cecal/colon inflammation with linear regression that  
150 included batch in the model (Table S2; Figure S2). These results were similar but showed  
151 significantly increased inflammation in chow-fed versus WD-fed mice (Figure S2). Cecal levels  
152 of TcdB and not TcdA strongly correlated with cecal inflammation (Figure 2; Table S3). Taken  
153 together, our results suggest that although TcdB levels are associated with higher intestinal  
154 inflammation in these mice just prior to onset of mortality, the differences cannot explain the  
155 increased mortality observed in the WD compared to low fat diets. Our data support a potential  
156 role for TcdA in the increased mortality with the WD, but via a mechanism independent of  
157 intestinal inflammation.

158

159 *Cecal levels of bile acids and their relationship to diet, cecal levels of C. difficile toxins, and*  
160 *inflammation*

161 To further explore mechanism, we used targeted LC/MS to measure the levels of a pool  
162 of 13 different bile acids in the aspirated cecal contents of a separate cohort of mice that were  
163 sacrificed at 3 days post infection (Table S2). Bile acids have a complex relationship with *C.*  
164 *difficile* germination and growth<sup>13,26-29</sup>. The primary bile acids TCA and CA can promote the  
165 germination of *C. difficile* spores *in vitro*<sup>13</sup> and primary bile acids including CA are elevated in  
166 individuals with first time or rCDI compared to controls<sup>30,31</sup>. The primary bile acid  
167 chenodeoxycholic acid (CDCA) can block TCA-induced spore germination<sup>27,28</sup> and another  
168 primary bile acid, Ursodeoxycholic acid (UDCA), can inhibit both *C. difficile* spore germination  
169 and *C. difficile* growth<sup>29</sup>. Furthermore, the murine primary bile acids alpha muricholic acid  
170 (a\_MCA) and beta muricholic acid (b\_MCA) can inhibit *C. difficile* spore germination and  
171 growth<sup>32</sup>. Of particular interest in this study are also the secondary bile acids DCA and  
172 lithocholate (LCA); these molecules are produced by the metabolic transformation of primary  
173 bile acids by intestinal microbes<sup>14</sup>, can arrest the growth of vegetative *C. difficile*<sup>13</sup>, and are  
174 lower in individuals with CDI<sup>30,31</sup>. We measured the levels of these bile acids with known  
175 effects on *C. difficile* as well as 5 other taurine-conjugated bile acids (Figure S3). To consider  
176 known effects of bile acids on *C. difficile* growth and germination in our analyses, we binned the  
177 bile acids that were inhibitors of *C. difficile* germination and/or growth (*CDCA*, *UDCA*, *a\_MCA*,  
178 *b\_MCA*, *LCA*, *DCA*), and *C. difficile* germination promoters (*TCA* and *CA*). We also evaluated  
179 the ratio of *C. difficile* promoters to inhibitors, as has been done previously<sup>19</sup>.

180 When comparing across diets, we were most interested in bile acid measures that showed  
181 differential levels between the WD and both the LF/LF and chow diets, since the WD had high  
182 CDI mortality compared to both the LF/LF and chow diets. *C. difficile* inhibitors were  
183 significantly lower in the WD compared to the chow diet, but there was not a difference between



184 the WD and the LF/LF diet (Figure 3A). *C. difficile* promoters had significantly higher levels in  
185 the WD compared to chow but not compared to the LF/LF diet (Figure 3A). Interestingly, the  
186 ratio of promoters:inhibitors was significantly higher in the WD compared to both the LF/LF diet  
187 and chow, consistent with mortality differences. We also analyzed whether each of the 13 bile  
188 acids individually differed across diets, and diet significantly affected the levels of most (Figure  
189 S3). However, none were individually significantly different in the WD compared to both the  
190 LF/LF and chow diet. While regressing cecal and colon inflammation scores (Figure 3B) and  
191 toxins TcdA and TcdB (data not shown) against bile acid summary measures, the only  
192 significant relationship observed was a negative correlation between *C. difficile* inhibitors and  
193 colon inflammation. Evaluating differences across diets using linear regression models that  
194 included batch did not affect the interpretation of these results (Fig S2). Taken together, these  
195 data support that bile acid pools were strongly influenced by diet, with the WD having the most  
196 pro-*C. difficile* bile acid composition, but more work needs to be done to determine the degree to  
197 which these differences were driving the higher mortality observed with the WD.

198

199 ***Cecal levels of SCFAs and their relationship to diet, secondary bile acids, cecal levels of C.***  
200 ***difficile toxins, and inflammation***

201 To further explore potential mechanisms of increased mortality in the WD-fed mice we  
202 also used targeted GC/MS to measure the levels of the SCFAs butyrate, propionate, and acetate  
203 in the aspirated cecal contents in mice that were sacrificed at 3 days post infection (Table S2).  
204 SCFAs are of interest because they are microbial products of fermentation of dietary fiber, have  
205 been previously implicated in the positive effects of a diet rich in MACs,<sup>15</sup> and are decreased in  
206 individuals with rCDI<sup>16</sup>. Although butyrate can directly suppress *C. difficile* growth *in vitro*<sup>15</sup>,

207 butyrate also enhances *C. difficile* toxin production *in vitro*<sup>15 33</sup>. We also directly evaluated the  
208 secondary bile acid DCA, since it can arrest the growth of vegetative *C. difficile*<sup>13</sup> and prior  
209 studies have shown that secondary bile acid producers such as *Clostridium scindens* can protect  
210 against CDI in mice<sup>14</sup>.

211 Butyrate, acetate, and DCA were all significantly higher in the chow diet compared to  
212 both the LF/LF diet and WD (Figures 3A and 4A). There was also a significant correlation  
213 between levels of DCA and butyrate in a multivariate regression that accounted for differences  
214 across diets (Figure 4B). This is consistent with both DCA and butyrate having been linked with  
215 the presence of a healthy protective gut microbiome composition and low levels of both have  
216 been observed in individuals with rCDI<sup>30,34</sup>. Surprisingly, butyrate positively correlated with  
217 TcdB (Figure 4C) and cecal and colonic inflammation (Figure 4D), but linear regression  
218 indicated that this relationship was dependent on diet, being driven by a positive association in  
219 the WD and LF/LF diet contexts only (Figure 4C, Table S3). DCA also correlated with TcdB  
220 levels and cecal and colonic inflammation in a diet dependent manner, with a positive  
221 relationship in LF/LF and WD and the expected negative (protective) relationship only in chow  
222 (Figure 4D, Table S3).

223  
224 ***A conventional chow diet increases homogeneity of response, resilience and alpha-diversity of***  
225 ***the gut microbiome after challenge with antibiotics and CDI compared to both purified diets***

226 We next sought to understand how the composition of the fecal microbiome was affected  
227 by diet during the course of antibiotic treatment and infection with *C. difficile* (Fig. 1A). Fecal  
228 pellets were collected during experiment 1 upon arrival prior to diet change (Day -7), just prior  
229 to the start of oral antibiotic delivery (Day 0), after 5 days of oral antibiotics (Day 5), and daily

230 through Day 10, which captured before and after the clindamycin injection given on day 7 and *C.*  
231 *difficile* gavage on Day 8 (Fig. 1A). Collected samples were subjected to 16S ribosomal RNA  
232 (rRNA) gene amplicon sequencing targeting the V4 region of the rRNA gene on the MiSeq  
233 platform.

234 Principle coordinate analysis (PCoA) plots of a weighted UniFrac<sup>35</sup> distance matrix  
235 suggested that mice fed either the WD or LF/LF diet had decreased resilience and a less  
236 homogeneous response to antibiotic challenge and CDI as compared to chow-fed mice (Figure  
237 5). Mice fed either the WD or LF/LF diet showed greater divergence across PC1 upon antibiotic  
238 exposure than chow-fed mice, higher spread across mice in the same diet group, and less  
239 recovery towards their baseline after antibiotics (Fig. 5A). We quantified resilience by  
240 comparing the pairwise weighted UniFrac distances of mice across the experiment to baseline  
241 microbiota of their respective diet cohort at Day 0 (7 days post-diet change and pre-oral  
242 antibiotics; Fig. 5B). Chow-fed mice had significantly smaller weighted UniFrac distances from  
243 their baselines than the other groups at Day 5 (post 5 days antibiotic challenge) that persisted  
244 through Day 10 despite some convergence after clindamycin injection (Day 8) (Fig. 5B). By Day  
245 9, chow-fed mice again displayed higher microbiome resilience than both the WD and LF/LF  
246 diet groups. We also assessed the homogeneity of response to a disturbance among mice in the  
247 same diet group. As an example, low homogeneity would occur if the mice within a diet group  
248 showed high variability in the degree to which their gut microbiome changed upon antibiotic  
249 exposure. We quantified this as the median pairwise weighted UniFrac distance for comparisons  
250 within samples collected at the same time point from mice fed the same diet (Fig. 5C). Both the  
251 WD and LF/LF diet showed much lower homogeneity of gut microbiome compositional

252 response to antibiotic challenge, particularly to the 5-day treatment with oral antibiotics (Day 5),  
253 compared to chow-fed mice (Fig. 5C).

254         Similar patterns were seen when evaluating changes in alpha-diversity across the  
255 experiment between each diet cohort. Figure 6 shows changes in phylogenetic entropy, which is  
256 a measure of alpha diversity that considers species richness, evenness, and distinctness<sup>36</sup>. The  
257 phylogenetic entropy of the WD-fed mice was lower than chow-fed mice after diet change and  
258 this difference became more pronounced upon oral antibiotics and remained so through the rest  
259 of the experimental timeline (Fig. 6). Interestingly, the phylogenetic entropy of the LF/LF diet-  
260 fed mice remained equivalent to the chow-fed cohort with diet change but decreased to the same  
261 level as the WD with antibiotic treatment (Fig. 6).

262

263 ***The WD and LF/LF diets had increased facultative anaerobe colonization and decreased***  
264 ***secondary bile acid and SCFA-producing bacteria compared to conventional chow diet***

265         Low-diversity dysbiosis is a state of disturbance that is often characterized not only by  
266 low alpha-diversity, but also by an increased ratio of facultative to strict anaerobes<sup>37</sup>. Low-  
267 diversity dysbiosis is associated with a number of diseases including rCDI<sup>37</sup>. We sought to  
268 investigate whether the different diets tested influenced if the microbiome developed a  
269 compositional state characterized by high levels of facultative anaerobe colonization and lower  
270 levels of strict anaerobes. Since Lactobacillales and Enterobacterales contain many important  
271 intestinal facultative anaerobes and most members of Clostridiales are strict anaerobes and  
272 include key butyrate and secondary bile acid producers, we plotted the relative abundances of  
273 these orders over the course of the experiment (Fig. 7A). All mice had decreases in the relative  
274 abundance of Clostridiales in their fecal microbiome with oral antibiotics; however, mice fed a

275 chow diet were able to maintain a Clostridiales population while both the WD and LF/LF diets  
276 saw near-complete elimination of these taxa (chow-WD  $p < 0.01$  for days 0 through 9 and  $p < 0.05$   
277 on day 10, Fig. S4). Conversely, mice fed either the WD or LF/LF diet had a large bloom of  
278 Lactobacillales after oral antibiotic treatment that was not observed in the chow-fed mice (chow-  
279 WD  $p < 0.001$  and chow-LF/LF  $p < 0.05$ ). Lastly, all 3 diet groups had a large increase in  
280 Enterobacterales in their fecal microbiome following antibiotics; however, the LF/LF and chow  
281 groups showed earlier decrease than WD mice (chow-WD  $p < 0.01$  and  $p < 0.05$  at days 9 and 10  
282 respectively, Fig. S4). Comparisons of the LF/LF diet were limited due to smaller sample size ( $n$   
283 = 5 vs.  $n = 13$  for chow and WD).

284 We also used PICRUSt<sup>38</sup> to predict metagenomes using our 16S rRNA data to 1)  
285 investigate trends in the prevalence of key genes in secondary bile and butyrate production over  
286 the course of our experimental timeline and 2) predict which bacterial taxa were contributing  
287 these genes. Because *baiA*, *baiB*, and *baiCD* are not available in PICRUSt2's set of predicted  
288 genes, we only used the genes for *baiH* (KEGG ID: K15873) and *baiI* (KEGG ID: K15874),  
289 which are both genes in the *bai* operon<sup>39</sup>, to assess genomic potential for secondary bile acid  
290 metabolism. Acetoacetate co-A transferase (*but*; K01034) and Butyrate Kinase (*buk*; KEGG ID:  
291 K00929), which are the main pathways for fermentative production of butyrate in the gut  
292 microbiome<sup>40</sup>, were used to assess butyrate production potential. Plotting these genes/pathways  
293 over time reveals a significant effect of diet on their abundance and response to antibiotics (Fig.  
294 7C). Although all diet groups showed a marked decrease in bile acid genes with oral antibiotics,  
295 only the chow-fed mice displayed a recovery of secondary bile acid genes, though the source of  
296 these genes switched from Lachnospiraceae UCG-006 to Blautia. This result is consistent with

297 our observation of higher cecal levels of secondary bile acids in chow-fed mice compared to  
298 mice fed either the WD or LF/LF diets at 3 days post *C. difficile* gavage (Fig. 4A).

299 Butyrate coding capacity also differed between diet groups. Chow-fed mice showed  
300 minimal change in the abundance of both the *but* and *buk* genes for fermentative butyrate  
301 production during the time course while the WD mice had a decrease of 5 orders of magnitude  
302 (Fig. 7D). The LF/LF diet-fed mice showed an intermediate phenotype with the resilience of the  
303 butyrate pathway being mostly attributed to a butyrate kinase dependent pathway. The results for  
304 *but* and not *buk* however are consistent with our measurements of cecal butyrate levels in these  
305 mice 3 days post *C. difficile* gavage (Fig. 4A). This is consistent with *but* being regarded to be a  
306 more important source of butyrate in the intestine <sup>41</sup>.

307 Since we had observed a strong positive correlation between cecal levels of butyrate and  
308 the secondary bile acid DCA in our mass spectrometry data (Fig. 4B), we also determined  
309 whether there was a relationship between butyrate and secondary bile acid coding capacity. We  
310 found a highly significant association ( $p = 3.6 \times 10^{-5}$ ), with secondary bile acid producing genes  
311 only predicted to be present in samples that also had high predicted levels of butyrate producing  
312 genes (Fig. 7B).

313

## 314 **Discussion**

315 *C. difficile* infection is a grave and growing health threat. Current strategies to limit its  
316 spread have focused on sanitation and antibiotic stewardship, however incidence has continued  
317 to rise despite these efforts, highlighting the need for new treatment and prevention strategies <sup>2</sup>.  
318 Because of the ubiquity of *C. difficile* spores in the environment and high levels of colonization,

319 focusing on ways to increase the resilience of the host to *C. difficile* disease is one important  
320 prevention strategy<sup>42</sup>.

321 Our results augment a growing body of evidence from studies conducted in mouse  
322 models of antibiotic induced *C. difficile* infection that points to dietary intervention as a  
323 promising approach to prevent antibiotic-induced CDI<sup>4,15,18,19</sup>. Prior studies have suggested the  
324 importance of a variety of macronutrients, including MACs, protein, and fat. Specifically, for  
325 MACs, one study that used an antibiotic-induced murine model demonstrated that mice fed a diet  
326 deficient in MACs (e.g. soluble fiber, resistant starches) had persistent *C. difficile* shedding and  
327 that there was a resolution of colonization with the reintroduction of inulin or other MACs<sup>15</sup>. A  
328 protective effect of dietary MACS was also demonstrated in a human clinical trial in which a  
329 decrease in *C. difficile* recurrence from 34.3% to 8.3% was observed with prebiotic  
330 supplementation<sup>43</sup>. Our results are consistent with these studies in that both the WD and LF/LF  
331 diets were low in MACs compared to the chow diet and had a greater antibiotic-induced  
332 disturbance to the gut microbiome and loss of CDI protective microbial metabolites such as  
333 DCA. However, it is important to note that the differences between conventional chow, WD and  
334 LF/LF diets extend well beyond fiber, and these other dietary components could also have  
335 influenced our observation. Also, our LF/LF diet had greatly reduced mortality compared to the  
336 WD, even though the LF/LF diet-fed mice was low in MACs and had a comparable level of  
337 microbiome disturbance and loss of protective metabolites with antibiotic treatment.

338 Influence of dietary protein has also been noted in a few studies. Specifically, one study  
339 found a low-protein diet to be protective in an antibiotic-induced CDI murine model, with mice  
340 fed a 2% protein diet having increased survival, decreased weight loss, and decreased overall  
341 disease severity compared to mice fed a 20% protein defined diet<sup>20</sup>. Another study showed that a

342 diet poor in proline (an essential amino acid for *C. difficile* growth) prevented *C. difficile*  
343 carriage<sup>4</sup>. Furthermore, in a recent study that evaluated both a high-fat/high-protein Atkins-type  
344 diet and a high-fat/low-protein diet in a mouse model of antibiotic-induced CDI, the high-  
345 fat/high-protein diet promoted severe CDI and 100% mortality, while the high-fat/low-protein  
346 diet had variable disease severity and survival, showing a strong effect of dietary protein but  
347 indicating that the effects of fats were uncertain<sup>18</sup>.

348 Another had found that a diet that was high in refined carbohydrates and low in fiber had  
349 improved CDI severity compared to mice fed a standard chow diet<sup>18</sup>. New data has suggested  
350 that novel speciation of *C. difficile* may be selecting for strains that show increased sporulation  
351 and host colonization capacity with sugar availability (glucose or fructose)<sup>47</sup>. This work,  
352 conducted with *C. difficile* strain (VPI 10463), did not show differences in mortality from CDI in  
353 low-fat/low-fiber diets with different amounts of sucrose<sup>18,19</sup>.

354 Our results show that high dietary fat in the context of low dietary fiber had a strong  
355 effect on CDI-induced mortality, with mechanisms distinct from a loss of beneficial microbial  
356 metabolites. Evidence to suggest that a high-fat/low-fiber western-type diet could have a  
357 profound effect on CDI was first presented over 20 years ago in experiments designed to study  
358 the atherogenic properties of a Western diet in Syrian hamsters<sup>44,45</sup>. Significant mortality from  
359 CDI was observed in hamsters fed a high-fat/low-fiber pro-atherogenic diet and not a typical  
360 high-fiber/low-fat hamster diet, even in the absence of an antibiotic disturbance<sup>44,45</sup>. Another  
361 recent study that conducted a study of antibiotic-induced CDI in a high-fat-diet (HFD) induced  
362 obesity model found protracted disease in the HFD compared to a chow diet<sup>19</sup>, but not the severe  
363 mortality that we observed with a high-fat/low-fiber diet. We posit that high dietary fat may have  
364 a more profound influence on CDI than low dietary fiber since a prior study of MAC deficient



365 diets found that low fiber was associated with higher *C. difficile* carriage but did not describe the  
366 severe disease/mortality that was observed here while using a similar mouse model<sup>15</sup>. However,  
367 since we did not test a high-fat/high-fiber diet, it is unclear whether the high mortality that we  
368 observed was due to a combination of high-fat and low-fiber in the diet, or just dietary fat.

369 Although these studies taken together support a potential synergy of high-fat and low-  
370 fiber leading to severe disease, it is important to note that these papers differ in many  
371 experimental parameters including the source of the mice (which has been shown to influence  
372 response to antibiotic perturbation and *C. difficile* clearance in mice<sup>46</sup>), types of antibiotics used,  
373 strain of *C. difficile*, and whether *C. difficile* was used as active growing bacteria (as done in our  
374 study) or as spores.

375

### 376 ***The Role of Toxin Production and Inflammation***

377 In order to further explore potential causes of death, we looked at both inflammation by  
378 histology and levels of the toxins TcdA and TcdB by ELISA in cecal contents collected 3 days  
379 post *C. difficile* infection, which was just prior to the onset of mortality in our longitudinal  
380 cohort. Both TcdA and TcdB can disrupt cytoskeletal structure and tight junctions of target cells  
381<sup>48</sup> and induce inflammation<sup>49, 3</sup>. We did not observe any differences in TcdB or cecal or colon  
382 inflammation scores across diets. However, cecal levels of TcdB did correlate with cecal  
383 inflammation, consistent with known effects of TcdB<sup>48 50</sup>. This supports that levels of TcdB  
384 produced by *C. difficile* may indeed be causing pathology in these mice, but higher levels of  
385 TcdB at Day 3 post CDI cannot alone explain the higher mortality that we began to observe at  
386 Day 4 post CDI infection in the WD-fed mice. Interestingly, TcdA and TcdB levels did not  
387 correlate with each other, and TcdA levels did show a pattern at Day 3 post-CDI consistent with

388 mortality, being significantly higher in the WD mice compared to the LF/LF-fed mice.  
389 Consistent with the LF/LF diet mice having delayed mortality compared to chow-fed mice, there  
390 were also lower levels of TcdA in the LF/LF fed mice compared to those fed a conventional  
391 chow diet at Day 3 post-CDI. However, unlike TcdB, TcdA levels did not correlate with  
392 inflammation. The lack of correlation of TcdA and TcdB with each other is surprising since they  
393 are often co-expressed, although their transcription is regulated by unique promoter regions<sup>51</sup>,  
394 and other post-transcriptional factors at the RNA or protein degradation level may also be at  
395 play. Studies of the activity of TcdA versus TcdB in various animal models have more strongly  
396 supported the importance of TcdB in CDI pathogenesis, and studies investigating TcdA have had  
397 mixed results<sup>48</sup>, although none of these studies were conducted in the context of a high-fat/low-  
398 fiber diet. Our results support a potential importance of TcdA and not TcdB in diet-associated  
399 differences in CDI pathogenesis, but further studies that sample the toxin levels at more time  
400 points over disease progression might prove illuminating. Indeed, another prior study that  
401 showed higher CDI pathology in HFD-induced obesity model versus a regular chow diet did not  
402 observe higher toxin levels (while binning TcdA and TcdB ELISA data) at day 3 post infection  
403 (acute phase), but did find higher toxin levels and intestinal inflammation between diets at day  
404 10 post infection, due to recovery occurring in the chow fed but not HFD-obese mice<sup>19</sup>.  
405 Although it is possible that differences in TcdB and inflammation across diets in our study may  
406 have emerged over time, it was not possible to evaluate this since we had much higher mortality  
407 in our model, and most of our WD fed mice would have died by day 10. Further studies that use  
408 complementary methods to measure toxin besides just ELISA, which can lack specificity for  
409 TcdB in particular<sup>52,53</sup>, or with strains of *C. difficile* that produce TcdA or TcdB only would be  
410 required for further validation<sup>52</sup>. Also, in these studies we measured toxin levels but were unable

411 to produce quality data regarding levels of *C. difficile* bacteria in the cecal materials. We thus  
412 cannot evaluate whether these differences in toxin levels are driven by more bacteria or increased  
413 toxin production by similar loads of bacteria.

414

#### 415 *Effects of bile acids*

416 Differences in host bile acid production and microbial bile acid metabolism is one  
417 potential mechanism of high-fat diet induced modulation of CDI severity. In the clinical setting,  
418 studies have shown that patients with CDI have increased TCA and decreased concentrations of  
419 the secondary bile acids DCA and LCA in their feces<sup>30,34</sup> as well as other complex alterations to  
420 bile acid pools<sup>31</sup>. These derangements are corrected with fecal microbiota transplant for  
421 treatment of *C. difficile* (FMT)<sup>34</sup>. *In vitro* experiments have shown that the primary bile acids  
422 TCA and CA are potent *C. difficile* germination factors<sup>13</sup> while UDCA and CDCA have been  
423 shown to inhibit germination and growth of *C. difficile in vitro*<sup>27,28,29</sup>. The microbially-produced  
424 secondary bile acids DCA and LCA have also been shown to affect *C. difficile in vitro*: DCA  
425 promotes germination of *C. difficile* spores<sup>13</sup> while LCA inhibits germination<sup>29</sup> and both inhibit  
426 growth of vegetative *C. difficile*<sup>13,29</sup>. In line with these effects, reduced prevalence of the  
427 secondary bile acid producer, *Clostridium scindens* in the fecal microbiome has been associated  
428 with high incidence of CDI in both humans and in experimental mouse models, and gavaging  
429 mice with *C. scindens* protected against CDI and restored intestinal secondary bile acid levels<sup>14</sup>.  
430 Despite this strong evidence of a role of a protective effect of microbially produced secondary  
431 bile metabolites in protection from CDI, this mechanism did not appear to be a sole driving  
432 factor of the mortality that we observed in mice fed a WD, since the levels of these metabolites  
433 were lowest in the mice fed the LF/LF diet even though the LF/LF mice did not experience

434 increased mortality. Levels of *C. difficile* inhibitors, which included the secondary bile acids  
435 DCA and LCA, did negatively correlate with colonic inflammation, suggesting some degree of  
436 protection in these mice. Functional interrogation of the microbiome using PICRUSt suggests  
437 that the lack of secondary bile acids in the WD and LF/LF diet fed mice might be due to a lack of  
438 recovery of secondary bile acid producing bacteria following antibiotic disturbance in both the  
439 WD and LF/LF diet contexts.

440 We did find that the ratio of *C. difficile* promoters:inhibitors was significantly higher in  
441 the WD compared to both the LF/LF and chow diets, consistent with mortality differences. Our  
442 results support that a high-fat diet coupled with low-fiber and antibiotic treatment may provide a  
443 “double hit” for shifting towards a pro-*C. difficile* bile acid pool – with dietary fat increasing  
444 excretion of pro- *C. difficile* primary bile acids into the gut and antibiotic-induced gut  
445 microbiome disturbance decreasing their conversion into protective secondary bile acids. *In vitro*  
446 assays have demonstrated that variable mixtures of primary and secondary bile acids have  
447 different impacts on *C. difficile* germination and growth<sup>54</sup>. However, more work needs to be  
448 done to determine the degree to which these differences were driving the higher mortality  
449 observed with the WD. A more convincing result would be if the *C. difficile* promoter:inhibitor  
450 ratio also predicted *C. difficile* toxin production while controlling for diet, but this was not the  
451 case (Fig. 3B).

452 We also found that diet had a significant effect on 4 of the 5 taurine conjugated bile acids  
453 that we assayed, with TCA, T\_b\_MCA, TDCA, and TCDCa all showing a pattern of increased  
454 levels in the WD compared to both the chow and LF/LF diets, but only comparisons of chow  
455 versus WD reaching statistical significance (Fig. S3). It is probable that the further decrease in  
456 levels of these taurine conjugated bile acids in the chow compared to the LF/LF diet is because

457 the primary bile acids that are produced by the host are converted by microbes to secondary bile  
458 acids in only the chow diet. Our finding of increased TCA in the WD compared to chow is  
459 consistent with a prior study that found that IL10-deficient mice fed a diet high in saturated fat,  
460 had an increased proportion of taurine-conjugated bile acids compared to standard chow, and a  
461 diet high in poly-unsaturated fats<sup>21</sup>. One prior study demonstrated that both TDCA and TCDCA  
462 have pro-germinative effects on *C. difficile*, though in our study, their cecal concentrations were  
463 orders of magnitude lower than TCA which is also a much stronger germinant<sup>55</sup>.

464 One weakness of our study is that we cannot differentiate between the complex changes  
465 of the bile acid pools and the effects of the dietary components themselves – such as known  
466 effects of high-fat diet on inflammation<sup>56,57</sup>. Controlled studies that directly alter bile acid pools  
467 without also altering diet are valuable. In one study of CDI in HFD-induced obesity, inhibiting  
468 primary bile acid synthesis with the FXR antagonist obeticholic acid ameliorated CDI disease  
469 during later phases of infection but not in acute CDI<sup>19</sup>. Another factor that may have influenced  
470 our result is that like other related studies<sup>15</sup>, our infection procedure used a sample cultured for  
471 ~24 hours without enumerating or enriching the sporulated fraction of the inoculum. As spores  
472 are the likely infective form of *C. difficile* in clinical settings, and many bile acids influence *C.*  
473 *difficile* pathogenesis by promoting or inhibiting germination, it is of interest to determine how  
474 the variability in vegetative composition influences the relationship between bile acid pools and  
475 CDI pathogenesis.

476

#### 477 ***Effects of the microbiome and their metabolites***

478 Our data suggests that a complex diet is critical for the resilience and homogeneity of  
479 response of the gut microbiome after perturbation. In both cohorts of mice fed a purified diet that

480 was deficient in fiber, the gut microbiome was significantly more variable and slower to recover  
481 to baseline after perturbation. We hypothesize that by supplying the gut with a preferred fuel  
482 (fiber) for species associated with health (e.g. strict anaerobes), the community is able to resist  
483 antibiotic induced changes and reconstitute more quickly once the pressure of antibiotic  
484 treatment has been removed. Since the chow diet differed from the purified diets in many  
485 components besides the levels of fiber, we cannot conclude from our study alone that increased  
486 resilience to microbiome disturbance with antibiotics in chow is driven by differences in fiber.  
487 However, our results are consistent with previous murine studies that have shown that low fiber  
488 diets can increase antibiotic-induced microbiome disturbance and delay recovery from treatment  
489 with ciprofloxacin<sup>58</sup> and that fiber supplementation can lead to a reduced disruption of the gut  
490 microbiome to disturbance from amoxicillin<sup>59</sup>.

491         The increased resilience of gut microbiome composition to antibiotic disturbance was  
492 also reflected through levels of the bacterially produced metabolites that we measured. Neither  
493 the WD or LF/LF diets were able to maintain butyrate or secondary bile acid production  
494 following antibiotic perturbation. Based on the correlation between butyrate and DCA  
495 concentrations, we speculate that the lack of butyrate leads to increased luminal oxygen  
496 concentrations that are unsuitable for *Clostridium scindens* and other secondary bile acid  
497 producers. Prior work has shown that aerobic metabolism of butyrate by intestinal epithelial cells  
498 is a key driver of intestinal hypoxia<sup>60</sup>. That there may be increased luminal oxygen  
499 concentrations in the LF/LF and WD is consistent with our observation of a bloom in  
500 Lactobacillales order, which is entirely composed of facultative anaerobes, after oral antibiotic  
501 challenge in the WD and LF/LF diets but not chow.

502           While our data do not suggest a role for fiber in protection against mortality from CDI in  
503 this mouse model since the LF/LF diet fed mice were protected without fiber in the diet, it would  
504 be short-sighted to dismiss the beneficial role of fiber in maintaining a healthy gut microbiome  
505 and resistance to CDI. Our model utilized a rather short-term diet change and an intense  
506 antibiotic regimen. We also did not explore diets high in fat and high in fiber, where it is possible  
507 that increased microbiome resilience to antibiotics due to fiber may protect from the detrimental  
508 effects of fat. As discussed above, a fiber-deficient diet has been shown to hinder clearance of *C.*  
509 *difficile* after challenge<sup>15</sup>.

510           One surprising finding of our work, however, given these protective effects of dietary  
511 Microbiota Accessible Carbohydrates (MACs) from other studies, was that butyrate, a major  
512 fermentation product of MACs, positively correlated with TcdB and cecal and colonic  
513 inflammation, driven by an association in the WD and LF/LF diet contexts and not chow. DCA  
514 also correlated with butyrate and with TcdB levels and cecal and colonic inflammation in a diet  
515 dependent manner, with a positive relationship in LF/LF and WD and the expected negative  
516 (protective) relationship only in chow. Butyrate is typically associated with beneficial effects on  
517 gut health, including supporting intestinal barrier function<sup>61,62,63</sup>, suppressing inflammation  
518 through induction of T regulatory cells<sup>64</sup>, and directly suppressing *C. difficile* growth *in vitro* in  
519 a dose dependent manner<sup>15</sup>. Also, lower butyrate and DCA has been observed clinically in  
520 individuals with CDI<sup>30,34</sup>. However, a positive correlation between butyrate and TcdB is  
521 consistent with prior studies showing that butyrate enhances *C. difficile* toxin production *in vitro*  
522<sup>15,33</sup>, leading some to suggest that butyrate may signal to *C. difficile* a competitive gut  
523 environment<sup>15</sup>. A similar diet-dependent detriment of SCFAs was observed in a study that  
524 showed that soluble fiber-supplementation drove hepatocellular carcinoma in mice in a manner

525 dependent on microbial fermentation to SCFAs, but this effect occurred when soluble fiber was  
526 added to a compositionally defined diet and not to a conventional chow diet<sup>65</sup>. Our results  
527 suggest that supplementation with soluble fibers such as inulin to prevent *C. difficile* may not  
528 produce the desired result in individuals who are otherwise consuming highly refined diets.

529

### 530 ***Limitations of our study:***

531 We have demonstrated a striking difference in diet-mediated mortality in an antibiotic-  
532 induced murine CDI model, but our study does have limitations. We did not explore how the  
533 composition of fat influences these factors. Our WD composition represents a typical diet in the  
534 United States based on population survey data. Further studies to determine if total fat intake or  
535 specific types of fat drive our observed phenotype are needed. Furthermore, we only evaluated  
536 the effects of fat in a low-fiber context. Evaluating a high-fat/high-fiber diet would elucidate  
537 whether the expected beneficial effects of fiber on the microbiome would temper the negative  
538 effects of high-fat. Comparisons between chow-fed mice and those receiving a purified diet are  
539 limited due to the marked differences in the composition of macronutrients<sup>66</sup>. Since this is an  
540 antibiotic-induced CDI model, our results only reflect effects of diet in the context of antibiotic  
541 disturbance. Finally, we note that we induced CDI infection using a standardized amount of live  
542 *C. difficile*, which is commonly used in murine studies of *C. difficile*<sup>22</sup>. However, we note that  
543 since different bile acids influence spore germination as well as growth, results may vary in  
544 challenge models that instead use spores. For instance, we might expect the promoters TCA and  
545 CA to have a stronger effect in spore-infection models compared to our model that used gavage  
546 with vegetative forms of *C. difficile*, since they are potent germination factors of *C. difficile*  
547 spores. Future experiments to compare these results to a spore-infection model could elucidate



548 the degree to which diet may affect CDI pathogenicity by influencing germination versus growth  
549 of *C. difficile* through modification of bile acid pools.

550

## 551 **Conclusions**

552 This study along with recently published findings investigating dietary fiber<sup>15</sup>, dietary  
553 proline<sup>4</sup>, protein<sup>18</sup>, and fat<sup>18,19</sup> intake provides a compelling case that diet should be  
554 increasingly targeted as a prevention and treatment modality for CDI. High-risk populations such  
555 as elderly hospitalized individuals subjected to antibiotics and adult and pediatric oncology  
556 patients may benefit from decreased *C. difficile* colonization through diets with decreased fat and  
557 increased fiber. For patients with active infection, limiting fat intake could decrease disease  
558 severity while maintaining enteric nutrition.

559

## 560 **Methods**

561 **Mouse diets:** Diets were all obtained from Envigo (Indiana): Standard chow - Teklad  
562 global soy protein-free extruded (item 2920X - [https://www.envigo.com/resources/data-](https://www.envigo.com/resources/data-sheets/2020x-datasheet-0915.pdf)  
563 [sheets/2020x-datasheet-0915.pdf](https://www.envigo.com/resources/data-sheets/2020x-datasheet-0915.pdf)), Western Diet – New Total Western Diet (item TD.110919),  
564 Low-fat/low-fiber – variant of AIN93G (item TD.180811). See Table S4 for detailed  
565 composition of purified diets.

566 **Murine model of CDI:** Mice were infected using a widely used murine CDI model<sup>22</sup>  
567 with minor modifications. Briefly, 6-week-old female C57BL/6 mice from Taconic Bioscience  
568 (Rensselaer, NY) arrived at University of Colorado on Day -7 of the experiment. During  
569 experiments, mice were cohoused in groups of 4-5 mice per cage. Survival experiments were  
570 conducted in four independent experiments at four separate starting dates. For cecal metabolite

571 and toxin analysis, 2-7 independent experiments were conducted with separate starting dates  
572 (Table S2). Within 24 hours, mouse feed was changed to one of three diets: standard chow, high-  
573 fat/low-fiber (WD), or LF/LF diet (all groups n=20 over 4 batches; Table S2). After seven days  
574 of the new diet, we placed mice on a five-antibiotic cocktail (kanamycin (0.4 mg/ml), gentamicin  
575 (0.035 mg/ml), colistin (850 U/ml), metronidazole (0.215 mg/ml), and vancomycin (0.045  
576 mg/ml)) in their drinking water. Antibiotics were removed for 48 hours, after which we  
577 administered an intraperitoneal injection of clindamycin in normal saline (10 mg/kg body  
578 weight). Twenty-four hours after injection, we gavaged mice with  $1.75 \times 10^5$  cfu of *C. difficile*  
579 VPI 10463 in the vegetative stage. We weighed mice daily after removal of oral antibiotics and  
580 they were euthanized if they lost >15% of body weight or were moribund. Fecal pellets were  
581 collected at arrival (Day -7), after diet change and prior to oral antibiotics (Day 0) and then daily  
582 after removal of oral antibiotics (Day 5-10). In a separate set of experiments, we performed the  
583 same experimental protocol on 66 mice (chow = 20, low-fat/low-fiber = 20, WD = 26) over 7  
584 different batches (see Table S2), but we sacrificed the mice 72 hours after infection and collected  
585 cecal contents for SCFA, bile acid and toxin quantification and cecum and intestines for  
586 histopathology. Mice for the second experiments were also obtained from Taconic Bioscience.  
587 All mouse experiments were approved by the Institutional Animal Care and Use Committee and  
588 complied with their guidelines and NIH Guide for the Care and Use of Laboratory Animals  
589 (IACUC protocol #00249).

590 ***C. difficile* growth:** *C. difficile* strain VPI 10463 (ATCC, Manassas Virginia) was used  
591 for all experiments. Frozen stocks were plated on to TCCFA agar plates (TekNova) and  
592 incubated overnight in an anaerobic chamber (Coy, Grass Lake, Michigan). Single colonies were  
593 picked and inoculated into BHI Media (Difco) and grown over night in anaerobic conditions.

594 Cell quantities were quantified with flow cytometry using the BD Cell Viability Kit with BD  
595 Liquid Counting Beads (BD Biosciences). Cultures were then centrifuged at 3,000 g for 15  
596 minutes and washed with sterile PBS three times before dilution into sterile water to a final  
597 concentration of  $9 \times 10^5$  cfu/mL.

598 **DNA Extraction and Sequencing:** Total genomic DNA was extracted from fecal pellets  
599 from a subset of the mice in cohort 1 (chow = 13 mice from four separate cages over two  
600 experiments, WD = 13 mice from four separate cages over two experiments, LF/LF = 5 mice  
601 from two cages over two experiments) using the DNeasy PowerSoil Kit (Qiagen, Germantown,  
602 MD). Modifications to the standard protocol included a 10-minute incubation at 65°C  
603 immediately following the addition of the lysis buffer and the use of a bead mill homogenizer at  
604 4.5 m/s for 1 min. The V4 variable region of the 16S rDNA gene was targeted for sequencing  
605 (515F: GTGCCAGCMGCCGCGGTAA, 806R: GGACTACHVGGGTWTCTAAT). The target  
606 DNA was amplified using 5Prime HotMaster Mix (Quantabio, Beverly, MA). Construction of  
607 primers and amplification procedures follow the Earth Microbiome Project guidelines  
608 ([www.earthmicrobiome.org](http://www.earthmicrobiome.org))<sup>67</sup>. Amplified DNA was quantified in a PicoGreen (ThermoFisher  
609 Scientific) assay and equal quantities of DNA from each sample was pooled. The pooled DNA  
610 was sequenced using a V2 2x250 kit on the Illumina MiSeq platform (San Diego, CA) at the  
611 University of Colorado Anschutz Medical Campus Genomics and Microarray Core facility.

612 **Sequence Data Analysis:** Raw paired-end FASTQ files were processed with QIIME 2  
613 version 2018.8<sup>68</sup>. Denoising was performed with DADA2<sup>69</sup>, a phylogenetic tree was built using  
614 sepp<sup>70</sup> and taxonomy was assigned to amplicon sequence variants (ASVs) using the RDP  
615 Classifier<sup>71</sup> trained on the Silva version 132 taxonomic database<sup>72 73</sup> using QIIME 2<sup>68</sup>. The data  
616 was rarefied at 5,746 sequences per sample. Alpha-diversity was measured by phylogenetic

617 entropy<sup>36</sup> and beta-diversity was determined by weighted UniFrac distances<sup>35</sup>. PCoA of  
618 weighted UniFrac plots were constructed using QIIME 2. Metagenomes were imputed from 16S  
619 ASVs using PICRUSt2's default pipeline for stratified genome contributions<sup>38</sup>. Low abundance  
620 taxa (<0.01% mean relative abundance) were filtered for analysis of the butyrogenic coding  
621 capacity. Software was installed using Anaconda<sup>74</sup> and analysis was performed on the Fiji  
622 compute cluster at the University of Colorado Boulder BioFrontiers Institute.

623       **SCFA quantification:** The SCFAs butyrate, propionate, and acetate were analyzed by  
624 stable isotope GC/MS as previously described<sup>75</sup>. Briefly, cecal samples were collected directly  
625 into pre-weighed, sterile cryo vials and flash frozen at -80°C until processing. Samples were  
626 then subject to an alkylation procedure in which sample and alkylating reagent were added,  
627 vortexed for 1 min, and incubated at 60°C for 25 min. Following cooling and addition of n-  
628 hexane to allow for separation, 170 µL of the organic phase was transferred to an auto sampler  
629 vial and analyzed by GC/MS. Results were quantified in reference to the stable isotope standard  
630 and normalized to sample weight.

631       **Bile acids quantification:** *Reagents:* LC/MS grade methanol, acetonitrile, and  
632 isopropanol were obtained from Fisher Scientific (Fairlawn, New Jersey). HPLC grade water  
633 was obtained from Burdick and Jackson (Morristown, New Jersey). Acetic acid, cholic acid  
634 (CA), chenodeoxycholic acid (CDCA), lithocholic acid (LCA), taurocholic acid (TCA) and  
635 deoxycholic acid (DCA) were obtained from Sigma Aldrich (St. Louis, Missouri).  
636 Taurodeoxycholic acid (TCDCA), taurochenodeoxycholic acid (TCDCA), tauroolithocholic acid  
637 (TLCA), alpha-muricholic acid (a\_MCA ) and beta-muricholic acid (b\_MCA) were obtained  
638 from Cayman Chemical (Ann Arbor, Michigan). Chenodeoxycholic acid-d4 (CDCA) and

639 glycochenodeoxycholic acid-d4 were obtained from Cambridge Isotope labs (Tewksberry,  
640 Massachusetts).

641 *Standards preparation:* An internal standard containing 21  $\mu\text{M}$  of chenodeoxycholic  
642 acid-d4 and 21  $\mu\text{M}$  of glycochenodeoxycholic acid-d4 was prepared in 100% methanol. A  
643 combined stock of all bile acid standards was prepared at 0.5mM in 100% methanol. Calibration  
644 working standards were then prepared by diluting the combined stock over a range of 0.05  $\mu\text{M}$ -  
645 50  $\mu\text{M}$  in methanol. A 20  $\mu\text{L}$  aliquot of each calibration working standard was added to 120  $\mu\text{L}$   
646 of methanol, 50  $\mu\text{L}$  of water and 10  $\mu\text{L}$  of internal standard (200  $\mu\text{L}$  total) to create 10  
647 calibration standards across a calibration range of 0.005  $\mu\text{M}$ -5  $\mu\text{M}$ .

648 *Sample preparation:* Fecal samples were prepared using the method described by  
649 Sarafian et al <sup>76</sup> with modifications. Briefly, 15-30mg of fecal sample were weighed in a tared  
650 microcentrifuge tube and the weight was recorded. 140  $\mu\text{L}$  of methanol, 15-30  $\mu\text{L}$  of water and  
651 10  $\mu\text{L}$  of internal standard were added. The sample was vortexed for 5 seconds, and then  
652 incubated in a -20°C freezer for 20 minutes. The sample was then centrifuged at 6000RPM for  
653 15 minutes at 4°C. 185-200  $\mu\text{L}$  of the supernatant was transferred to an RSA autosampler vial  
654 (Microsolv Technology Corporation, Leland, NC) for immediate analysis or frozen at -70°C  
655 until analysis.

656 *High performance liquid chromatography/quadrupole time-of-flight mass spectrometry*  
657 *(HPLC/QTOF):* HPLC/QTOF mass spectrometry was performed using the method described by  
658 Sarafian et al <sup>76</sup> with modifications. Separation of bile acids was performed on a 1290 series  
659 HPLC from Agilent (Santa Clara, CA) using an Agilent SB-C18 2.1X100mm 1.8  $\mu\text{m}$  column  
660 with a 2.1X5mm 1.8 $\mu\text{m}$  guard column. Buffer A consisted of 90:10 water:acetonitrile with 1mM  
661 ammonium acetate adjusted to pH=4 with acetic acid, and buffer B consisted of 50:50

662 acetonitrile:isopropanol. 10  $\mu$ L of the extracted sample was analyzed using the following  
663 gradient at a flow rate of 0.6mls/min: Starting composition=10% B, linear gradient from 10-35%  
664 B from 0.1-9.25 minutes, 35-85% B from 9.25-11.5 minutes at 0.65mls/min, 85-100% B from  
665 11.5-11.8 minutes at 0.8mls/min, hold at 100% B from 11.8-12.4 minutes at 1.0ml/min, 100-55%  
666 B from 12.4-12.5 minutes 0.85mls/min, followed by re-equilibration at 10% B from 12.5-15  
667 minutes. The column temperature was held at 60°C for the entire gradient.

668 Mass spectrometric analysis was performed on an Agilent 6520 quadrupole time of flight  
669 mass spectrometer in negative ionization mode. The drying gas was 300°C at a flow rate of  
670 12mls/min. The nebulizer pressure was 30psi. The capillary voltage was 4000V. Fragmentor  
671 voltage was 200V. Spectra were acquired in the mass range of 50-1700m/z with a scan rate of 2  
672 spectra/sec.

673 Retention time and m/z for each bile acid was determined by injecting authentic  
674 standards individually. All of the bile acids produced a prominent [M-H]<sup>-</sup> ion with negative  
675 ionization. The observed retention time and m/z was then used to create a quantitation method.  
676 Calibration curves for each calibrated bile acid were constructed using Masshunter Quantitative  
677 Analysis software (Aligent Technologies). Bile acid results for feces in pmol/mg were then  
678 quantitated using the following calculation:

$$679 \quad \text{Concentration in pmol/mg} = \frac{(X_s)(V_t)(D)}{(V_i)(W_s)}$$

680  $X_s$  =pmol on column

681  $V_t$  =Total volume of concentrated extract (in  $\mu$ L)

682  $D$  =Dilution factor if sample was extracted before analysis. If no dilution  $D=1$

683  $V_i$  =Volume of extract injected (in  $\mu\text{L}$ )

684  $W_s$  =Weight of sample extracted in mg

685 ***C. difficile* toxin TcdA and TcdB quantification:** TcdA and TcdB concentrations were  
686 determined in cecal samples from day 3 of infection by comparison to a standard curve using  
687 ELISA (tgcBiomics, Germany). For samples that were too small to weigh accurately, a mass of 5  
688 mg was assigned for concentration calculation. This mass was selected as it was the lowest  
689 weight that could be accurately determined.

690 **Histologic evaluation of large intestinal tissue:** Cecum and transverse colon were  
691 harvested from mice three days after infection with *C. difficile* from mice fed either a chow diet  
692 (n=9), LF/LF (n=10) or WD (n=14) total in 3 separate experiments (Table S2). Tissue was fixed  
693 in 10% formalin in PBS, paraffin embedded and sections cut before hematoxylin and eosin  
694 staining by the University of Colorado Histopathology Core. Inflammation was assessed in the  
695 cecum using the Barthel scoring system<sup>24</sup> and in the colon using the Dieleman scoring system<sup>23</sup>  
696 by a trained histologist. Briefly, the Barthel system scores damage to the cecum using 0-3 scores  
697 for submucosal edema, neutrophil infiltration, number of goblet cells, and epithelial integrity for  
698 a composite score of 0 to 12. The Dieleman system scores colonic damage from 0 to 3 for  
699 inflammation, and extent of injury, plus scores from 0 to 4 for epithelial regeneration, and crypt  
700 damage. Each score is multiplied by a factor from 0 to 4 accounting for % involvement (0 = 0%  
701 and 4 = 100%) for a composite score from 0 to 56. Please see original references for more  
702 details.

703 **Statistics:** Statistical analyses were performed in R (version 3.4.3 “Kite-Eating Tree”).  
704 Data were preprocessed using the “tidyverse” suite<sup>77</sup>. We used “survminer” and “survival”  
705 libraries to analyze mouse survival<sup>78,79</sup>. All other data were plotted using “ggplot2”, “ggsignif”,

706 and “cowplot”<sup>80,81,82</sup>. All statistical tests were two-tailed with measurements from distinct  
707 samples.

708

### 709 **Data availability**

710 The 16S rRNA has been deposited in QIITA<sup>83</sup> (Qiita Study ID: 12849) and at EBI  
711 (ERP133015).

712

### 713 **Acknowledgments**

714 We would like to thank Jordi Lanis and Sean Colgan for advice on the employed CDI mouse  
715 model and Sally Stabler and Whitney Phinney for their assistance in measuring SCFAs. We also  
716 appreciate the contribution to this research made by E. Erin Smith, TL(ASCP)CMQIHC, Jenna  
717 Van Der Volgen, HT(ASCP)CM, Allison Quador, HTL(ASCP)CM, and Jessica Arnold  
718 HTL(ASCP)CM of the University of Colorado for the histology analyses. ***Funding:*** This work  
719 was supported by NIH U01 AI150589. Additional support was provided by the University of  
720 Colorado Department of Medicine’s Outstanding Early Career Science Award program as well  
721 as support to Keith Hazleton from the Institutional Training Grant for Pediatric Gastroenterology  
722 from NIDDK (5T32-DK067009-12), Clinical Fellow Awards from the Cystic Fibrosis  
723 Foundation (HAZLET18DO and HAZLET19DO) and The Judith Sondheimer Pediatric GI  
724 Fellow Research Fund. Kathleen Arnolds was supported by T32-AI007405 Training Program in  
725 Immunology. High performance computing was supported by a cluster at the University of  
726 Colorado Boulder funded by National Institutes of Health 1S10OD012300. The Denver  
727 Histology Shared Resource is supported in part by the Cancer Center Support Grant  
728 (P30CA046934).



729

730 **Competing interests**

731 The authors declare that there are no competing interests.

732

733 **Author contributions**

734 KH conceived of and conducted experiments, analyzed data and co-wrote the paper; CM  
735 analyzed data, made figures, and contributed to data interpretation and writing; KA generated  
736 and analyzed data from toxin ELISA; NN generated 16S rRNA sequence data and aided in  
737 analysis and results interpretation; NMH aided in mouse experiments, 16S rRNA sequencing and  
738 generation of toxin ELISA data; NR and MA worked with KH to develop a bile acid panel and  
739 aided in analysis and interpretation of results; DO performed histologic evaluation of intestinal  
740 tissues; CL directed and contributed to all aspects of the project. All authors contributed to the  
741 manuscript.

## 742 **References**

- 743 1. Lessa, F. C. et al. Burden of Clostridium difficile infection in the United States. *N Engl J*  
744 *Med* **372**, 825-834 (2015).
- 745 2. Leffler, D. A. & Lamont, J. T. Clostridium difficile infection. *N Engl J Med* **372**, 1539-  
746 1548 (2015).
- 747 3. Ng, J. et al. Clostridium difficile toxin-induced inflammation and intestinal injury are  
748 mediated by the inflammasome. *Gastroenterology* **139**, 542-52, 552.e1 (2010).
- 749 4. Battaglioli, E. J. et al. Clostridioides difficile uses amino acids associated with gut  
750 microbial dysbiosis in a subset of patients with diarrhea. *Sci Transl Med* **10**, eaam7019  
751 (2018).
- 752 5. Lozupone, C. A. et al. Meta-analyses of studies of the human microbiota. *Genome Res* **23**,  
753 1704-1714 (2013).
- 754 6. Bignardi, G. E. Risk factors for Clostridium difficile infection. *J Hosp Infect* **40**, 1-15  
755 (1998).
- 756 7. Fekety, R. et al. Recurrent Clostridium difficile diarrhea: characteristics of and risk factors  
757 for patients enrolled in a prospective, randomized, double-blinded trial. *Clin Infect Dis* **24**,  
758 324-333 (1997).
- 759 8. Theriot, C. M. et al. Antibiotic-induced shifts in the mouse gut microbiome and  
760 metabolome increase susceptibility to Clostridium difficile infection. *Nat Commun* **5**, 3114  
761 (2014).
- 762 9. Chang, J. Y. et al. Decreased diversity of the fecal Microbiome in recurrent Clostridium  
763 difficile-associated diarrhea. *J Infect Dis* **197**, 435-438 (2008).

- 764 10. Seekatz, A. M., Rao, K., Santhosh, K. & Young, V. B. Dynamics of the fecal microbiome  
765 in patients with recurrent and nonrecurrent *Clostridium difficile* infection. *Genome Med* **8**,  
766 47 (2016).
- 767 11. Khanna, S. et al. Gut microbiome predictors of treatment response and recurrence in  
768 primary *Clostridium difficile* infection. *Aliment Pharmacol Ther* **44**, 715-727 (2016).
- 769 12. Martinez-Augustin, O. & Sanchez de Medina, F. Intestinal bile acid physiology and  
770 pathophysiology. *World J Gastroenterol* **14**, 5630-5640 (2008).
- 771 13. Sorg, J. A. & Sonenshein, A. L. Bile salts and glycine as cogerminants for *Clostridium*  
772 *difficile* spores. *J Bacteriol* **190**, 2505-2512 (2008).
- 773 14. Buffie, C. G. et al. Precision microbiome reconstitution restores bile acid mediated  
774 resistance to *Clostridium difficile*. *Nature* **517**, 205-208 (2015).
- 775 15. Hryckowian, A. J. et al. Microbiota-accessible carbohydrates suppress *Clostridium difficile*  
776 infection in a murine model. *Nat Microbiol* **3**, 662-669 (2018).
- 777 16. Antharam, V. C. et al. Intestinal dysbiosis and depletion of butyrogenic bacteria in  
778 *Clostridium difficile* infection and nosocomial diarrhea. *J Clin Microbiol* **51**, 2884-2892  
779 (2013).
- 780 17. Zackular, J. P. et al. Dietary zinc alters the microbiota and decreases resistance to  
781 *Clostridium difficile* infection. *Nat Med* **22**, 1330-1334 (2016).
- 782 18. Mefferd, C. C. et al. A High-Fat/High-Protein, Atkins-Type Diet Exacerbates  
783 *Clostridioides (Clostridium) difficile* Infection in Mice, whereas a High-Carbohydrate Diet  
784 Protects. *mSystems* **5**, e00765-19 (2020).
- 785 19. Jose, S. et al. Obeticholic acid ameliorates severity of *Clostridioides difficile* infection in  
786 high fat diet-induced obese mice. *Mucosal Immunology* **14**, 500-510 (2021).

- 787 20. Moore, J. H. et al. Defined Nutrient Diets Alter Susceptibility to *Clostridium difficile*  
788 Associated Disease in a Murine Model. *PLoS One* **10**, e0131829 (2015).
- 789 21. Devkota, S. et al. Dietary-fat-induced taurocholic acid promotes pathobiont expansion and  
790 colitis in *Il10*<sup>-/-</sup> mice. *Nature* **487**, 104-108 (2012).
- 791 22. Chen, X. et al. A mouse model of *Clostridium difficile*-associated disease.  
792 *Gastroenterology* **135**, 1984-1992 (2008).
- 793 23. Dieleman, L. A. et al. Chronic experimental colitis induced by dextran sulphate sodium  
794 (DSS) is characterized by Th1 and Th2 cytokines. *Clin Exp Immunol* **114**, 385-391 (1998).
- 795 24. Barthel, M. et al. Pretreatment of mice with streptomycin provides a *Salmonella enterica*  
796 serovar Typhimurium colitis model that allows analysis of both pathogen and host. *Infect*  
797 *Immun* **71**, 2839-2858 (2003).
- 798 25. Benjamini, Y. & Hochberg, Y. Multiple Hypotheses Testing with Weights. *Scandinavian*  
799 *Journal of Statistics* **24**, 407-418 (1997).
- 800 26. Francis, M. B., Allen, C. A., Shrestha, R. & Sorg, J. A. Bile acid recognition by the  
801 *Clostridium difficile* germinant receptor, CspC, is important for establishing infection.  
802 *PLoS Pathog* **9**, e1003356 (2013).
- 803 27. Sorg, J. A. & Sonenshein, A. L. Chenodeoxycholate is an inhibitor of *Clostridium difficile*  
804 spore germination. *J Bacteriol* **191**, 1115-1117 (2009).
- 805 28. Sorg, J. A. & Sonenshein, A. L. Inhibiting the initiation of *Clostridium difficile* spore  
806 germination using analogs of chenodeoxycholic acid, a bile acid. *J Bacteriol* **192**, 4983-  
807 4990 (2010).

- 808 29. Weingarden, A. R. et al. Ursodeoxycholic Acid Inhibits *Clostridium difficile* Spore  
809 Germination and Vegetative Growth, and Prevents the Recurrence of Ileal Pouchitis  
810 Associated With the Infection. *J Clin Gastroenterol* **50**, 624-630 (2016).
- 811 30. Allegretti, J. R. et al. Recurrent *Clostridium difficile* infection associates with distinct bile  
812 acid and microbiome profiles. *Aliment Pharmacol Ther* **43**, 1142-1153 (2016).
- 813 31. Robinson, J. I. et al. Metabolomic networks connect host-microbiome processes to human  
814 *Clostridioides difficile* infections. *J Clin Invest* **129**, 3792-3806 (2019).
- 815 32. Francis, M. B., Allen, C. A. & Sorg, J. A. Muricholic acids inhibit *Clostridium difficile*  
816 spore germination and growth. *PLoS One* **8**, e73653 (2013).
- 817 33. Karlsson, S., Lindberg, A., Norin, E., Burman, L. G. & Akerlund, T. Toxins, butyric acid,  
818 and other short-chain fatty acids are coordinately expressed and down-regulated by  
819 cysteine in *Clostridium difficile*. *Infect Immun* **68**, 5881-5888 (2000).
- 820 34. Seekatz, A. M. et al. Restoration of short chain fatty acid and bile acid metabolism  
821 following fecal microbiota transplantation in patients with recurrent *Clostridium difficile*  
822 infection. *Anaerobe* **53**, 64-73 (2018).
- 823 35. Lozupone, C. A., Hamady, M., Kelley, S. T. & Knight, R. Quantitative and qualitative beta  
824 diversity measures lead to different insights into factors that structure microbial  
825 communities. *Appl Environ Microbiol* **73**, 1576-1585 (2007).
- 826 36. Allen, B., Kon, M. & Bar-Yam, Y. A new phylogenetic diversity measure generalizing the  
827 shannon index and its application to phyllostomid bats. *Am Nat* **174**, 236-243 (2009).
- 828 37. Kriss, M., Hazleton, K. Z., Nusbacher, N. M., Martin, C. G. & Lozupone, C. A. Low  
829 diversity gut microbiota dysbiosis: drivers, functional implications and recovery. *Curr*  
830 *Opin Microbiol* **44**, 34-40 (2018).

- 831 38. Langille, M. G. et al. Predictive functional profiling of microbial communities using 16S  
832 rRNA marker gene sequences. *Nat Biotechnol* **31**, 814-821 (2013).
- 833 39. Ridlon, J. M., Kang, D. J. & Hylemon, P. B. Bile salt biotransformations by human  
834 intestinal bacteria. *The Journal of Lipid Research* **47**, 241-259 (2006).
- 835 40. Vital, M., Howe, A. C. & Tiedje, J. M. Revealing the bacterial butyrate synthesis pathways  
836 by analyzing (meta)genomic data. *mBio* **5**, e00889 (2014).
- 837 41. Vital, M., Gao, J., Rizzo, M., Harrison, T. & Tiedje, J. M. Diet is a major factor governing  
838 the fecal butyrate-producing community structure across Mammalia, Aves and Reptilia.  
839 *ISME J* **9**, 832-843 (2015).
- 840 42. Zacharioudakis, I. M., Zervou, F. N., Pliakos, E. E., Ziakas, P. D. & Mylonakis, E.  
841 Colonization with toxinogenic *C. difficile* upon hospital admission, and risk of infection: a  
842 systematic review and meta-analysis. *Am J Gastroenterol* **110**, 381-90 (2015).
- 843 43. Lewis, S., Burmeister, S. & Brazier, J. Effect of the prebiotic oligofructose on relapse of  
844 *Clostridium difficile*-associated diarrhea: a randomized, controlled study. *Clin*  
845 *Gastroenterol Hepatol* **3**, 442-448 (2005).
- 846 44. Blankenship-Paris, T. L., Chang, J., Dalldorf, F. G. & Gilligan, P. H. In vivo and in vitro  
847 studies of *Clostridium difficile*-induced disease in hamsters fed an atherogenic, high-fat  
848 diet. *Lab Anim Sci* **45**, 47-53 (1995).
- 849 45. Blankenship-Paris, T. L., Walton, B. J., Hayes, Y. O. & Chang, J. *Clostridium difficile*  
850 infection in hamsters fed an atherogenic diet. *Vet Pathol* **32**, 269-273 (1995).
- 851 46. Tomkovich, S., Stough, J. M. A., Bishop, L. & Schloss, P. D. The Initial Gut Microbiota  
852 and Response to Antibiotic Perturbation Influence *Clostridioides difficile* Clearance in  
853 Mice. *mSphere* **5**, e00869-20 (2020).

- 854 47. Kumar, N. et al. Adaptation of host transmission cycle during *Clostridium difficile*  
855 speciation. *Nat Genet* **51**, 1315-1320 (2019).
- 856 48. Di Bella, S., Ascenzi, P., Siarakas, S., Petrosillo, N. & di Masi, A. *Clostridium difficile*  
857 Toxins A and B: Insights into Pathogenic Properties and Extraintestinal Effects. *Toxins*  
858 (*Basel*) **8**, 134-125 (2016).
- 859 49. Carter, G. P. et al. Defining the Roles of TcdA and TcdB in Localized Gastrointestinal  
860 Disease, Systemic Organ Damage, and the Host Response during *Clostridium difficile*  
861 Infections. *mBio* **6**, e00551 (2015).
- 862 50. Savidge, T. C. et al. *Clostridium difficile* toxin B is an inflammatory enterotoxin in human  
863 intestine. *Gastroenterology* **125**, 413-420 (2003).
- 864 51. Dupuy, B. & Sonenshein, A. L. Regulated transcription of *Clostridium difficile* toxin  
865 genes. *Mol Microbiol* **27**, 107-120 (1998).
- 866 52. Litvin, M. et al. Identification of a pseudo-outbreak of *Clostridium difficile* infection (CDI)  
867 and the effect of repeated testing, sensitivity, and specificity on perceived prevalence of  
868 CDI. *Infect Control Hosp Epidemiol* **30**, 1166-1171 (2009).
- 869 53. Walker, R. C. et al. Comparison of culture, cytotoxicity assays, and enzyme-linked  
870 immunosorbent assay for toxin A and toxin B in the diagnosis of *Clostridium difficile*-  
871 related enteric disease. *Diagn Microbiol Infect Dis* **5**, 61-69 (1986).
- 872 54. Theriot, C. M., Bowman, A. A. & Young, V. B. Antibiotic-Induced Alterations of the Gut  
873 Microbiota Alter Secondary Bile Acid Production and Allow for *Clostridium difficile*  
874 Spore Germination and Outgrowth in the Large Intestine. *mSphere* **1**, e00045-15 (2016).
- 875 55. Howerton, A., Ramirez, N. & Abel-Santos, E. Mapping interactions between germinants  
876 and *Clostridium difficile* spores. *J Bacteriol* **193**, 274-282 (2011).

- 877 56. Ding, S. et al. High-fat diet: bacteria interactions promote intestinal inflammation which  
878 precedes and correlates with obesity and insulin resistance in mouse. *PLoS One* **5**, e12191  
879 (2010).
- 880 57. Doerner, S. K. et al. High-Fat Diet-Induced Complement Activation Mediates Intestinal  
881 Inflammation and Neoplasia, Independent of Obesity. *Mol Cancer Res* **14**, 953-965 (2016).
- 882 58. Ng, K. M. et al. Recovery of the Gut Microbiota after Antibiotics Depends on Host Diet,  
883 Community Context, and Environmental Reservoirs. *Cell Host Microbe* **26**, 650-665.e4  
884 (2019).
- 885 59. Cabral, D. J. et al. Microbial Metabolism Modulates Antibiotic Susceptibility within the  
886 Murine Gut Microbiome. *Cell Metab* **30**, 800-823.e7 (2019).
- 887 60. Kelly, C. J. et al. Crosstalk between Microbiota-Derived Short-Chain Fatty Acids and  
888 Intestinal Epithelial HIF Augments Tissue Barrier Function. *Cell Host Microbe* **17**, 662-  
889 671 (2015).
- 890 61. Kanauchi, O. et al. Butyrate from bacterial fermentation of germinated barley foodstuff  
891 preserves intestinal barrier function in experimental colitis in the rat model. *J Gastroenterol*  
892 *Hepatol* **14**, 880-888 (1999).
- 893 62. Wang, H. B., Wang, P. Y., Wang, X., Wan, Y. L. & Liu, Y. C. Butyrate enhances intestinal  
894 epithelial barrier function via up-regulation of tight junction protein Claudin-1  
895 transcription. *Dig Dis Sci* **57**, 3126-3135 (2012).
- 896 63. Peng, L., He, Z., Chen, W., Holzman, I. R. & Lin, J. Effects of butyrate on intestinal barrier  
897 function in a Caco-2 cell monolayer model of intestinal barrier. *Pediatr Res* **61**, 37-41  
898 (2007).



- 899 64. Furusawa, Y. et al. Commensal microbe-derived butyrate induces the differentiation of  
900 colonic regulatory T cells. *Nature* **504**, 446-450 (2013).
- 901 65. Singh, V. et al. Dysregulated Microbial Fermentation of Soluble Fiber Induces Cholestatic  
902 Liver Cancer. *Cell* **175**, 679-694.e22 (2018).
- 903 66. Klurfeld, D. M. et al. Considerations for best practices in studies of fiber or other dietary  
904 components and the intestinal microbiome. *Am J Physiol Endocrinol Metab* **315**, E1087-  
905 E1097 (2018).
- 906 67. Thompson, L. R. et al. A communal catalogue reveals Earth's multiscale microbial  
907 diversity. *Nature* **551**, 457-463 (2017).
- 908 68. Bolyen, E. et al. Reproducible, interactive, scalable and extensible microbiome data science  
909 using QIIME 2. *Nat Biotechnol* **37**, 852-857 (2019).
- 910 69. Callahan, B. J. et al. DADA2: High-resolution sample inference from Illumina amplicon  
911 data. *Nat Methods* **13**, 581-583 (2016).
- 912 70. Janssen, S. et al. Phylogenetic Placement of Exact Amplicon Sequences Improves  
913 Associations with Clinical Information. *mSystems* **3**, 581 (2018).
- 914 71. Wang, Q., Garrity, G. M., Tiedje, J. M. & Cole, J. R. Naive Bayesian classifier for rapid  
915 assignment of rRNA sequences into the new bacterial taxonomy. *Appl Environ Microbiol*  
916 **73**, 5261-5267 (2007).
- 917 72. Quast, C. et al. The SILVA ribosomal RNA gene database project: improved data  
918 processing and web-based tools. *Nucleic Acids Res* **41**, D590-6 (2013).
- 919 73. Yilmaz, P. et al. The SILVA and "All-species Living Tree Project (LTP)" taxonomic  
920 frameworks. *Nucleic Acids Res* **42**, D643-8 (2014).
- 921 74. Anaconda Software Distribution.

- 922 75. Kelly, C. J. et al. Oral vitamin B<sub>12</sub> supplement is delivered to the distal gut, altering the  
923 corrinoid profile and selectively depleting Bacteroides in C57BL/6 mice. *Gut Microbes* **10**,  
924 654-662 (2019).
- 925 76. Sarafian, M. H. et al. Bile acid profiling and quantification in biofluids using ultra-  
926 performance liquid chromatography tandem mass spectrometry. *Anal Chem* **87**, 9662-9670  
927 (2015).
- 928 77. Wickham, H. et al. Welcome to the Tidyverse. *Journal of Open Source Software* **4**, 1686  
929 (2019).
- 930 78. Kassambara, A., Kosinski, M., Biecek, P. & Fabian, S. survminer: Drawing Survival  
931 Curves using ggplot2. <https://rpkgs.datanovia.com/survminer/> (2020).
- 932 79. Therneau, T. M. & Lumley, T. survival: Survival Analysis. [https://cran.r-](https://cran.r-project.org/web/packages/survival/survival.pdf)  
933 [project.org/web/packages/survival/survival.pdf](https://cran.r-project.org/web/packages/survival/survival.pdf) (2021).
- 934 80. Wickham, H. *ggplot2* (Springer, 2010).
- 935 81. Ahlmann-Eltze, C. ggsignif: Significance Brackets for 'ggplot2'. [https://cran.r-](https://cran.r-project.org/web/packages/ggsignif/ggsignif.pdf)  
936 [project.org/web/packages/ggsignif/ggsignif.pdf](https://cran.r-project.org/web/packages/ggsignif/ggsignif.pdf) (2021).
- 937 82. Wilke, C. O. cowplot: Streamlined Plot Theme and Plot Annotations for ggplot2.  
938 <https://wilkelab.org/cowplot/index.html> (2020).
- 939 83. Gonzalez, A. et al. Qiita: rapid, web-enabled microbiome meta-analysis. *Nat Methods* **15**,  
940 796-798 (2018).
- 941

## 942 **Figure Legends**

943 **Figure 1:** *Experimental design of murine model of antibiotic-induced CDI and survival curves.*

944 **(A)** *C. difficile* challenge experimental design. The figure legend at the left panel indicates the  
945 samples sizes for 2 cohorts; more information on batching and n's per assay is given in Table  
946 S2). Cohort 1 was followed for 13 days post *C. difficile* gavage to monitor survival and gut  
947 microbiome composition over time. Cohort 2 was sacrificed at 3 days post *C. difficile* gavage to  
948 collect cecal contents for measurement of metabolites and toxin and colon and cecal mucosa for  
949 histopathology (some assays were only conducted on a subset of Cohort 2; but all in at least 2  
950 independent experiments; see Table S2 for details). Grey and orange boxes indicate the  
951 timepoints at which samples were collected for the respective cohorts. **(B)** Survival curves on the  
952 3 diets. Statistical significance as assessed by log-rank comparison is indicated.

953

954 **Figure 2:** *Toxin and histopathology scores by diet.* **(A)** TcdA and TcdB production across diets  
955 as determined by ELISA. **(B)** Histologic inflammation scores across diets as determined by a  
956 blinded histologist. Significant differences were calculated with a Kruskal-Wallis and Dunn's  
957 post hoc test. Kruskal-Wallis p-values were corrected for multiple comparisons with the FDR  
958 algorithm of Benjamini and Hochberg<sup>25</sup>. Also see Figure S2 for statistical analysis with linear  
959 modeling that controlled for batch. Median and Interquartile Range (IQR) indicated. (\* : p <  
960 0.05, \*\* : p < 0.01, \*\*\* : p < 0.001, \*\*\*\* : p < 0.0001) **(C)** Linear regression of cecal  
961 histopathology against *C. difficile* TcdB burden. (p = 0.001 with model cecum\_infl ~ TcdB and  
962 FDR correction). **(D)** Example sections of cecal (left) and colon (right) tissues with low or  
963 medium inflammation. No samples had levels of inflammation considered to be high. The cecum  
964 was scored for injury according to the system of Barthel et al, 2003<sup>24</sup>. Scoring of inflammation

965 using the Barthel scoring system is restricted to neutrophils in the mucosa portion of the cecum.  
966 In low cecal inflammation, no neutrophils are observed in the mucosa (red bracket) while they  
967 are observed with medium inflammation. Medium cecal inflammation also displayed  
968 submucosal edema (blue bracket) that is thought to occur at least to some degree due to the  
969 neutrophils present in the submucosa. The colon (right panels) was scored for injury according to  
970 the system of Dieleman et al, 1998<sup>23</sup>. This system takes into account the relative quantity of  
971 inflammatory cells as well as whether they are found only in the mucosa layer (red bracket), are  
972 also in the submucosa (green arrow), or are found all the way through the muscularis (blue  
973 bracket) and into the peritoneal cavity.

974

975 **Figure 3:** *Bile acid pools in cecal contents of infected mice 3 days post C. difficile infection. (A)*  
976 *Cecal levels of C. difficile inhibitors (CDCA, UDCA, a\_MCA, b\_MCA, LCA, DCA), C. difficile*  
977 *promoters (TCA, CA), DCA, and ratios of promoters:inhibitors across diets (chow n = 20, LF n =*  
978 *20, WD n = 25; Table S2). Significant differences calculated with a Kruskal-Wallis and Dunn's*  
979 *post hoc test. Kruskal-Wallis p-values were corrected for multiple comparisons with the FDR*  
980 *algorithm of Benjamini and Hochberg. Median and IQR indicated. (\* : p < 0.05, \*\* : p < 0.01,*  
981 *\*\*\* : p < 0.001, \*\*\*\* : p < 0.0001) (B) Linear regressions of cecal or colonic histology against*  
982 *CD inhibitors, CD promoters, and the promoter:inhibitor ratios. Only colon inflammation versus*  
983 *C. difficile inhibitors was significant.*

984

985 **Figure 4:** *Relationships between microbial metabolites (SCFAs and the secondary bile acid*  
986 *DCA) and diet, toxin, and inflammation. (A) Cecal levels of the SCFAs acetate, butyrate, and*  
987 *propionate. p-values were determined using a Kruskal-Wallis with Dunn's post hoc test. Median*

988 and IQR indicated. (\* :  $p < 0.05$ , \*\* :  $p < 0.01$ , \*\*\* :  $p < 0.001$ ) **(B)** Multiple linear regression of  
989 DCA levels as a function of butyrate and diet. Model =  $\ln(\text{DCA}) \sim \ln(\text{butyrate}) + \text{diet} +$   
990  $\ln(\text{butyrate}) * \text{diet}$ . R-squared 0.855  $p < 0.0001$ . **(C)** Multiple linear regressions of *C. difficile* toxin  
991 TcdA and TcdB concentrations against butyrate and DCA while controlling for dietary  
992 interactions. **(D)** Multiple linear regressions of cecal or colonic histology against butyrate and  
993 DCA while controlling for dietary interactions.

994

995 **Figure 5:** *Beta diversity plots of fecal microbiome by diet during antibiotic treatment and*  
996 *infection with C. difficile.* Vertical red lines in panels B and C designate the day of *C. difficile*  
997 infection (chow n = 13, LF n = 5, WD n = 13). **(A)** Weighted UniFrac PCoA plots of all samples  
998 with each diet highlighted in separate panels. **(B)** Resilience of microbiome composition  
999 assessed by within-mouse pairwise weighted UniFrac distances between Day 0 (7 days post diet  
1000 switch and prior to oral antibiotics) and later time points and **(C)** Longitudinal plot of  
1001 microbiome turnover homogeneity as plotted by intra-time point pairwise Weighted UniFrac  
1002 distances within diet groups. Significant differences between diet groups were calculated by  
1003 Kruskal Wallis followed by Dunn's post hoc test. Trend lines were fit using local polynomial  
1004 regression. \*\*\*:  $p < 0.001$ . \*\*:  $p < 0.01$ , \*:  $p < 0.05$  ns= non-significant.

1005

1006 **Figure 6:** *Alpha-diversity (phylogenetic entropy) of the fecal microbiome during murine CDI*  
1007 *model.* Data for each individual mouse is plotted as well as the fitted local polynomial regression  
1008 for each diet group. Significant differences between diet groups were calculated by Kruskal  
1009 Wallis followed by Dunn's post hoc test. \* :  $p < 0.05$ , \*\* :  $p < 0.01$ , \*\*\* :  $p < 0.001$ .

1010

1011 **Figure 7:** *Changes in key taxa, and secondary bile acid and butyrate coding capacity during the*  
1012 *CDI protocol.* The vertical red line in (A), (C) and (D) indicates the day of *C. difficile* infection.  
1013 All trend lines were fit using local polynomial regression. **(A)** Relative abundance of key  
1014 bacterial orders during antibiotic treatment and infection. A summary of significant differences  
1015 of these taxa across diets are in Fig. S4. **(B)** Violin plots of abundance of butyrate genes from  
1016 PICRUSt2 analysis binned by presence of secondary bile acid producing genes (Wilcoxon  
1017  $p < 0.001$ ). **(C)** Time course of coding capacity of secondary bile acid genes. The top row shows  
1018 the total capacity of each sample (*baiH* and *baiI*) while the bottom two rows show specific taxa  
1019 contributions of key genes in the Bai operon. **(D)** Time course of coding capacity of butyrate  
1020 producing genes by diet. The top row shows the total capacity as measured by *but* and *buk* genes  
1021 while the bottom two rows show specific taxa contributions of *but* and *buk* specifically. Taxa  
1022 with mean relative abundance  $< 0.01\%$  were filtered from the analysis.

**Table 1**

Diet Composition

|                                                 | <b>Chow diet</b> | <b>WD</b>                          | <b>LF/LF diet</b>                  |
|-------------------------------------------------|------------------|------------------------------------|------------------------------------|
| Fat (% kcal)<br>(% SFA)<br>(% MUFA)<br>(% PUFA) | 16<br>(N/A)      | 34.5<br>(36.2)<br>(41.3)<br>(22.5) | 17.2<br>(19.5)<br>(41.7)<br>(38.8) |
| Carbohydrates (% kcal)<br>(Sucrose)             | 60<br>(0)        | 50<br>(23.4)                       | 63.9<br>(10.6)                     |
| Protein (%kcal)                                 | 24               | 15.5                               | 18.8                               |
| Fiber (g/kg)                                    | 137              | 50 (cellulose)                     | 50 (cellulose)                     |

**a**

|                                               | chow | LF/LF | WD |
|-----------------------------------------------|------|-------|----|
| <b>Cohort 1</b><br>Stool collection           | 20   | 20    | 20 |
| <b>Cohort 2</b><br>Cecal contents & Histology | 20   | 20    | 26 |

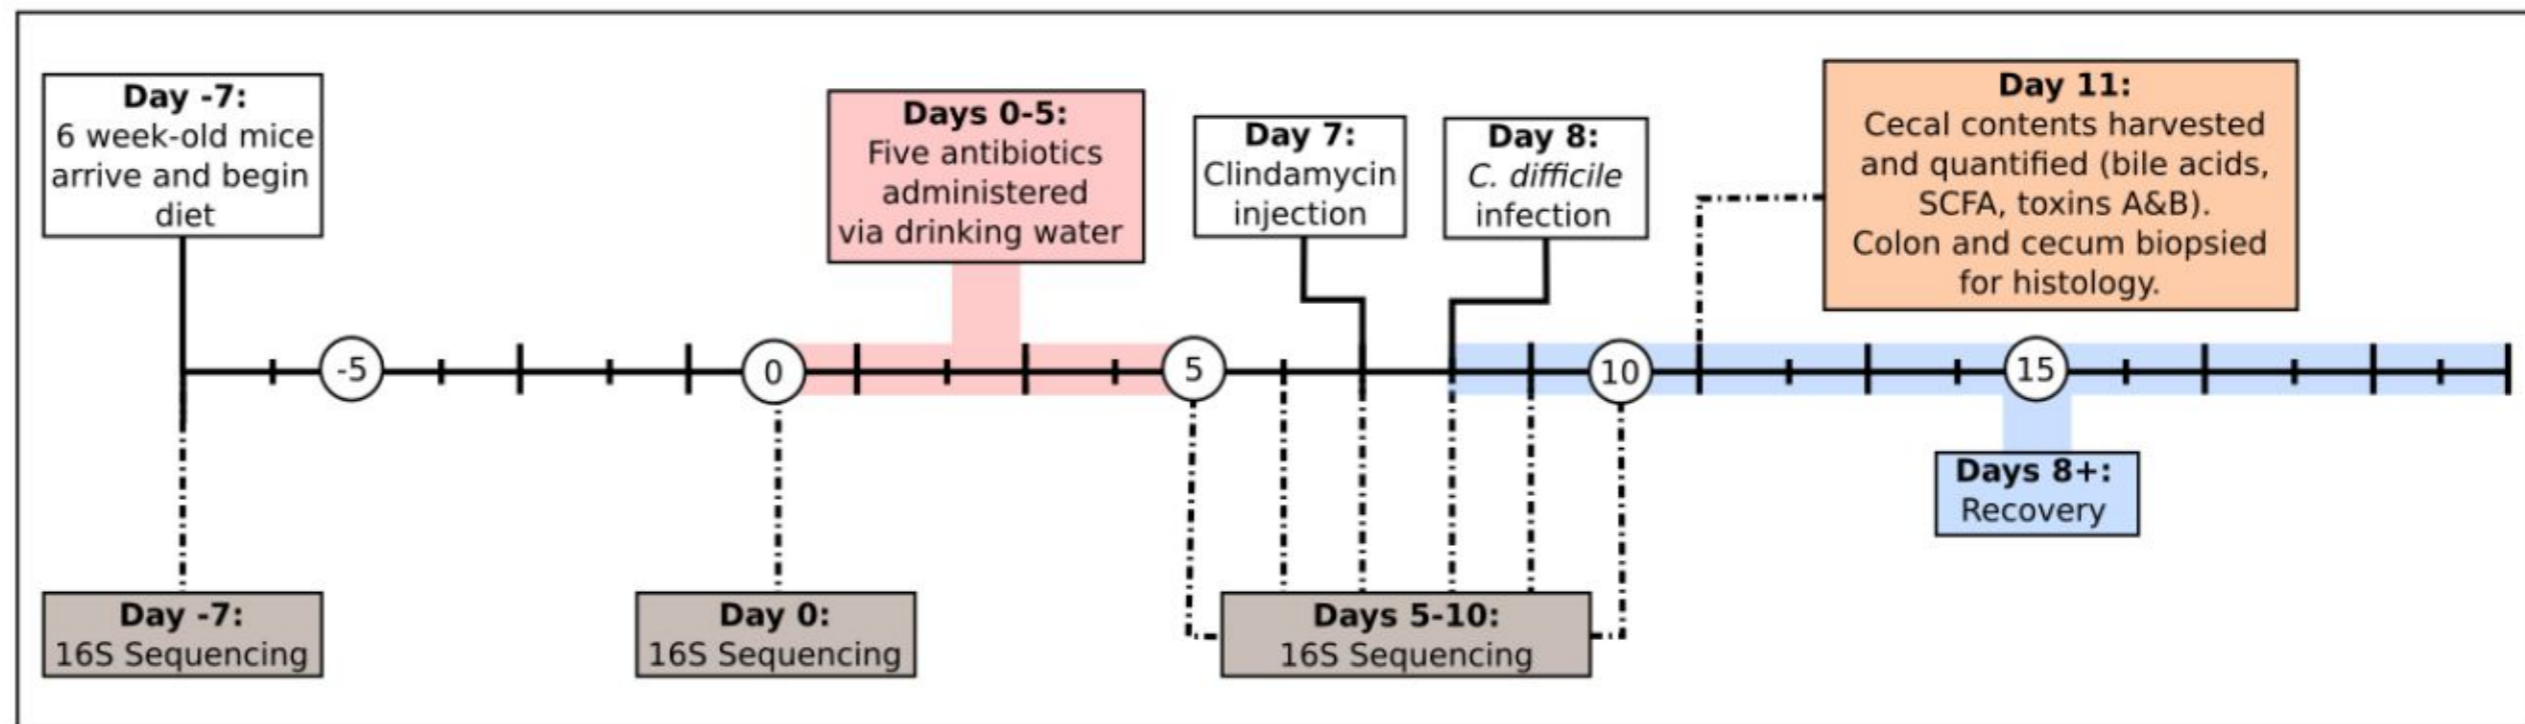**b**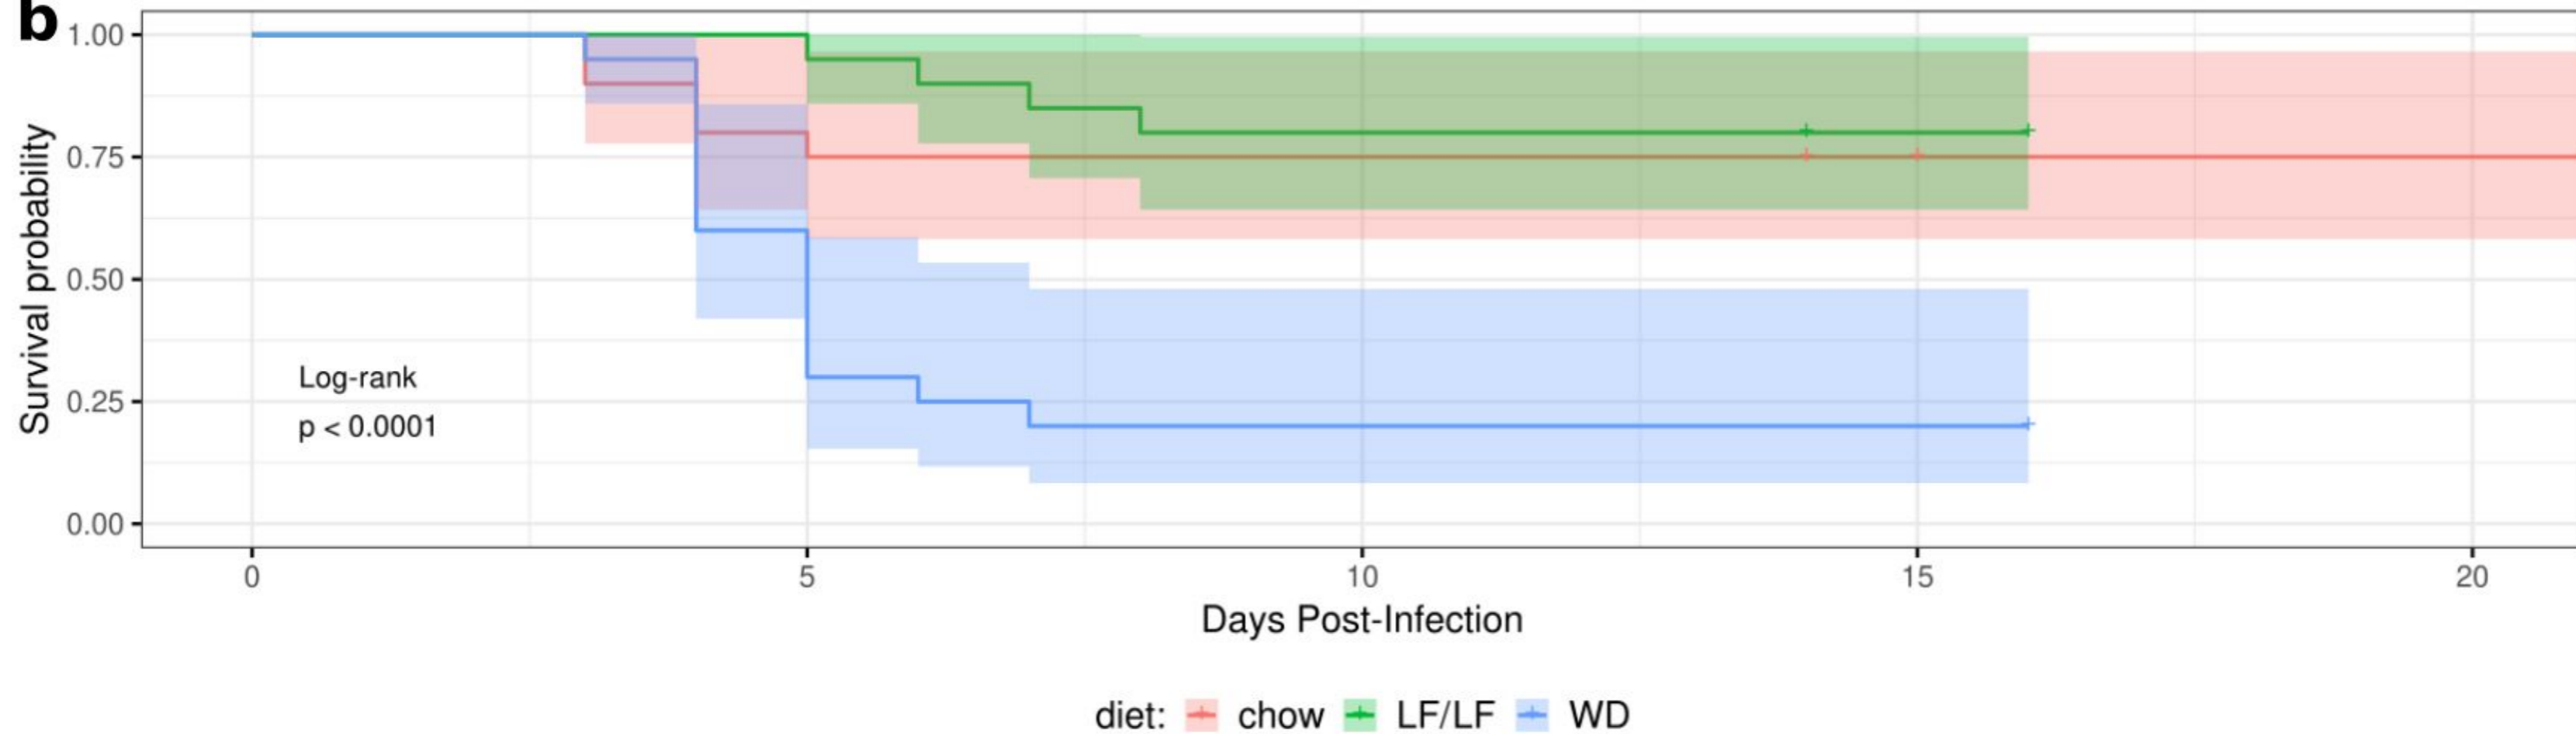



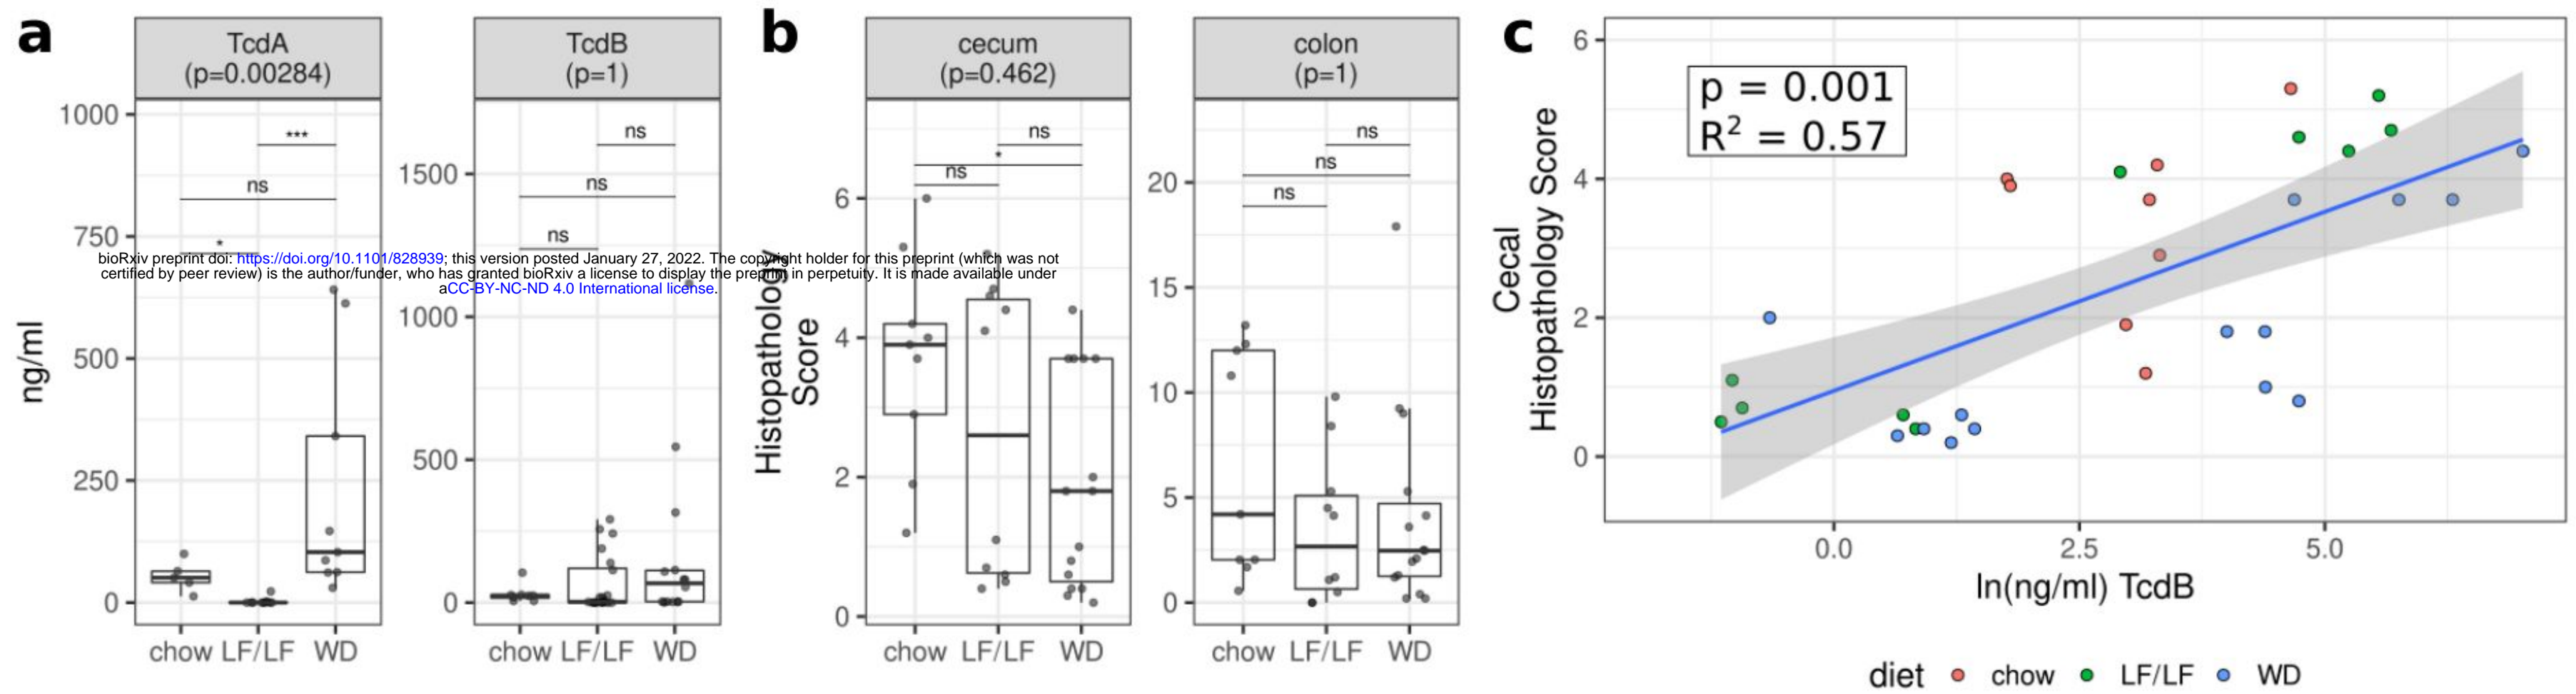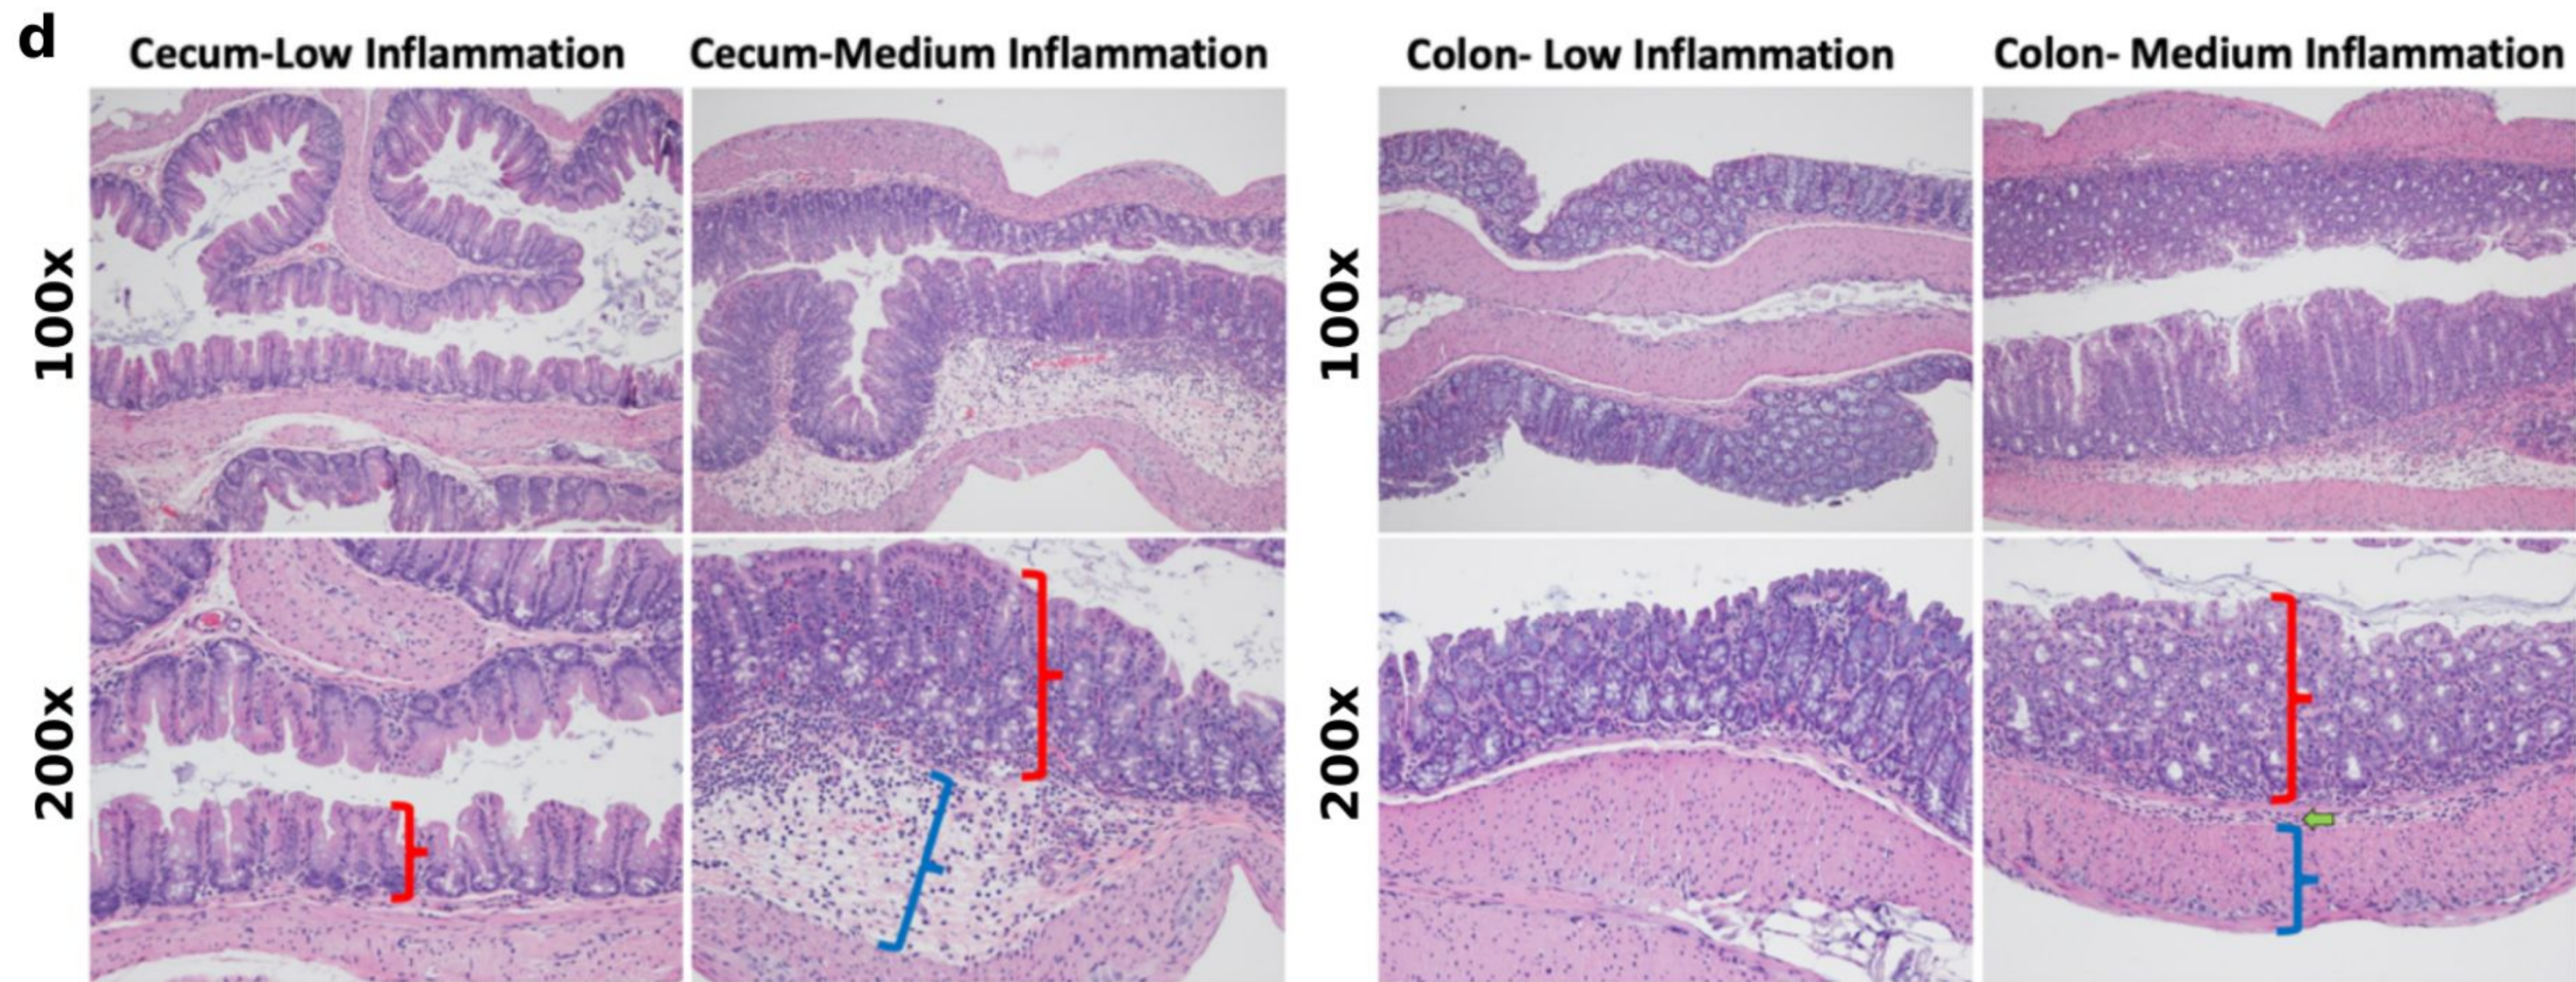

**a**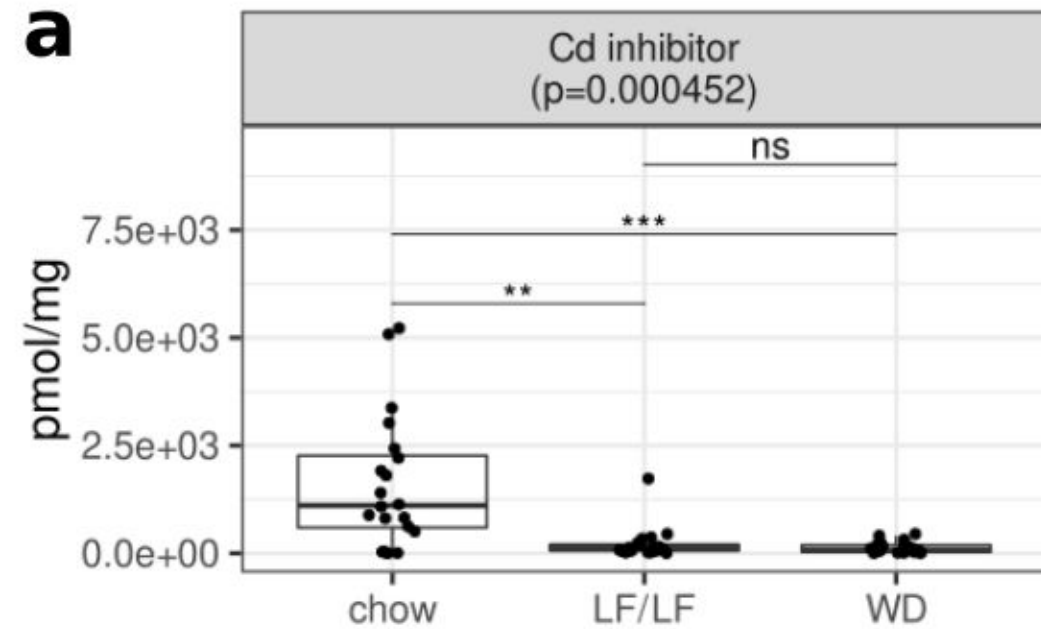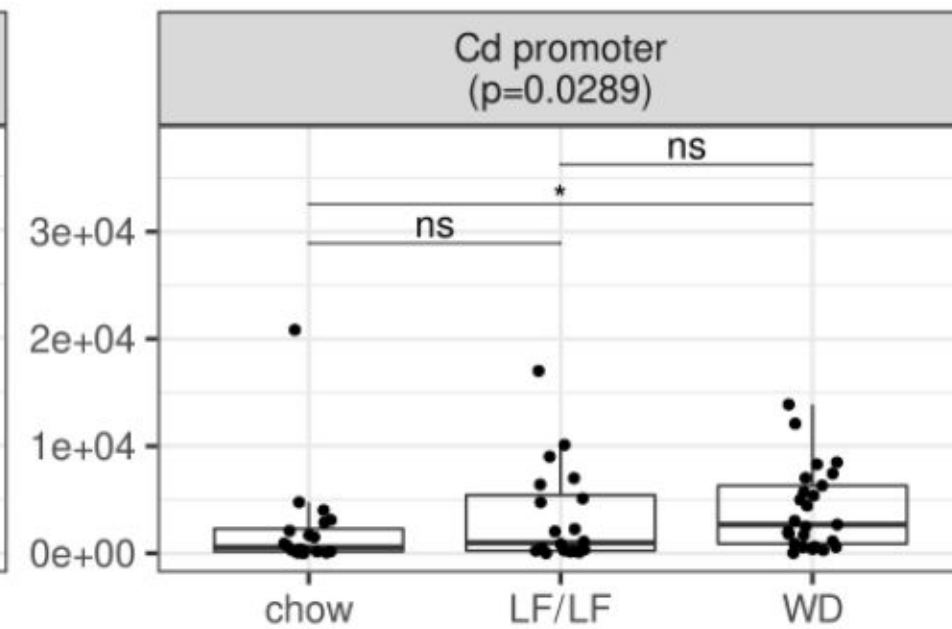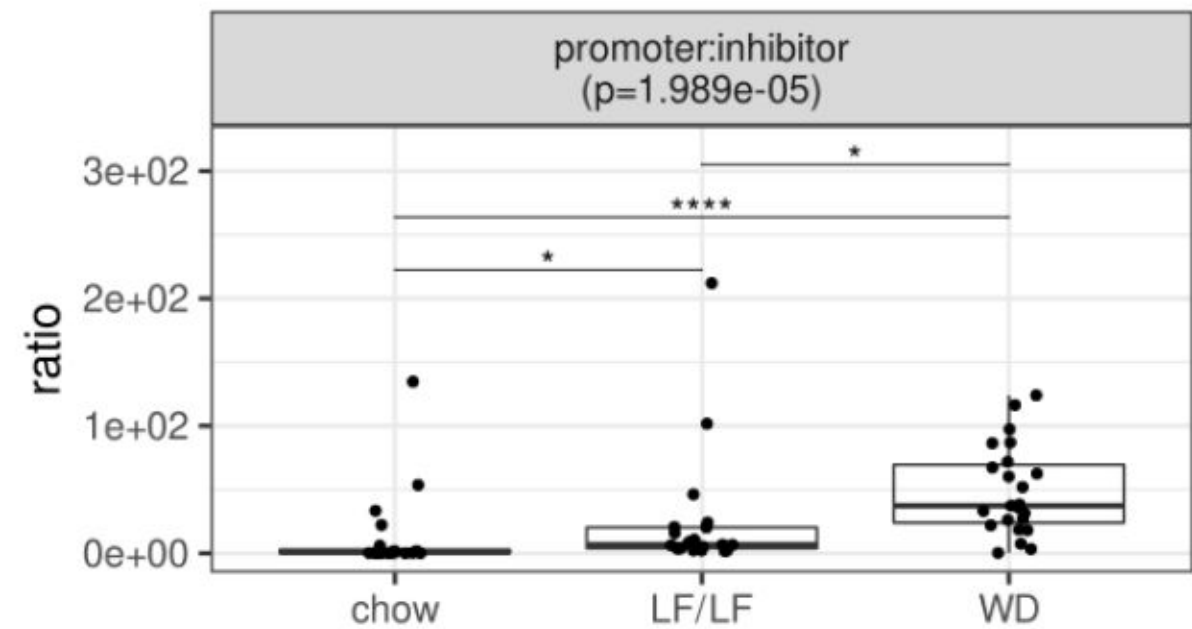**b**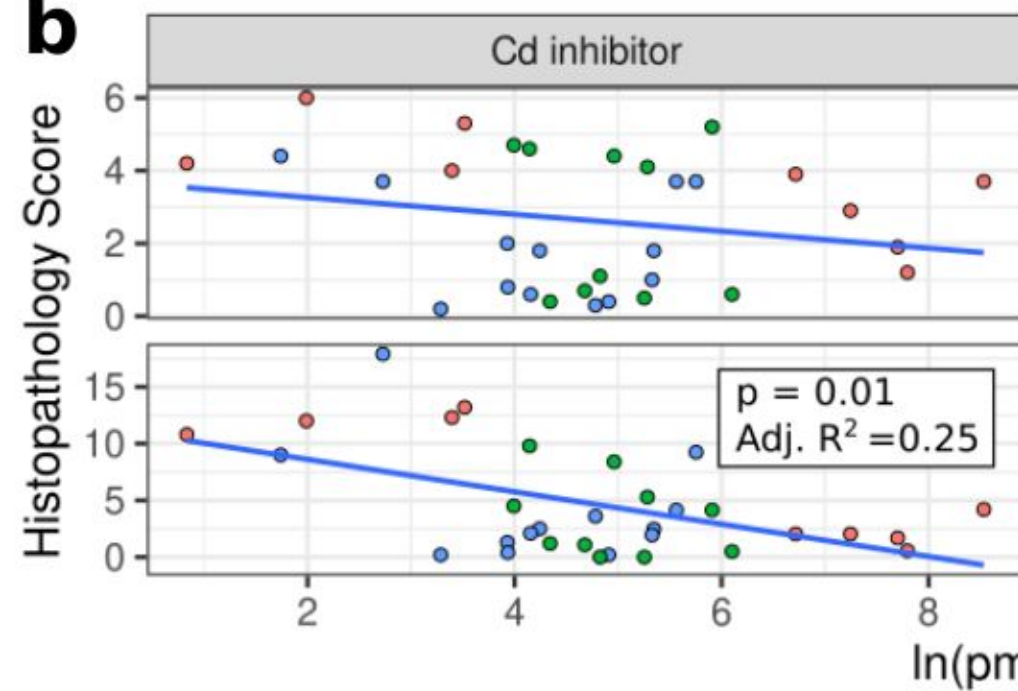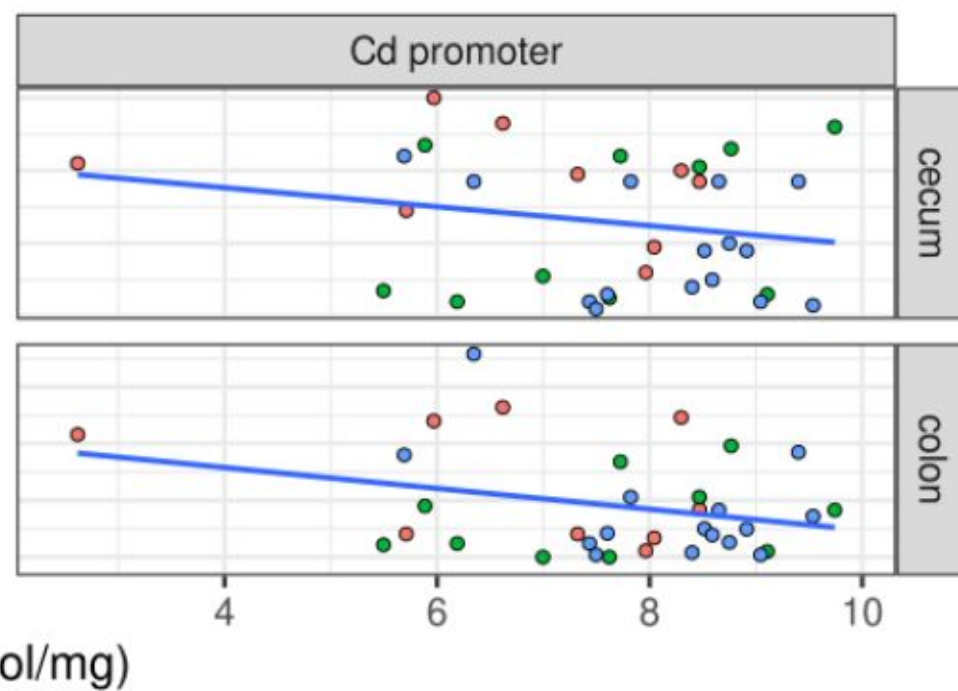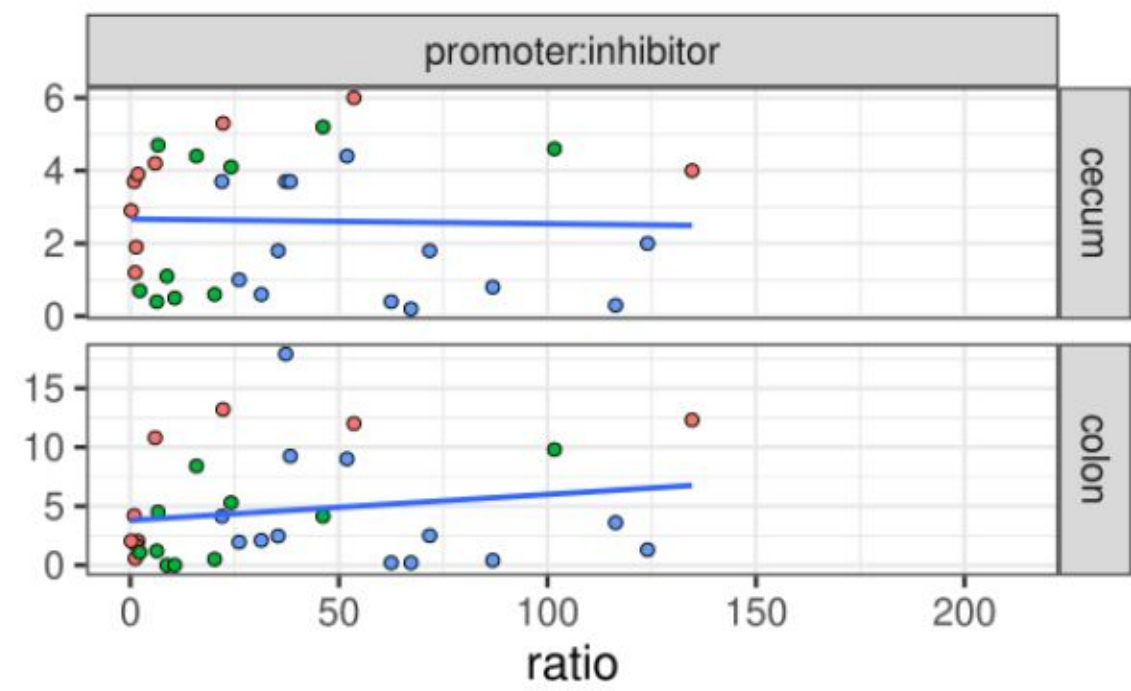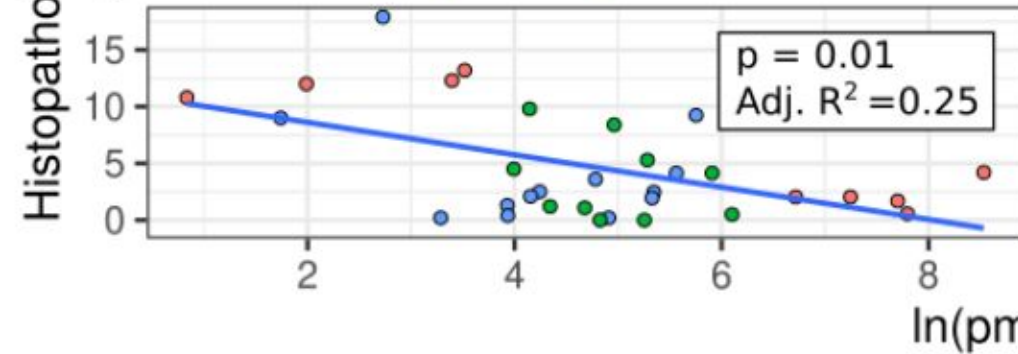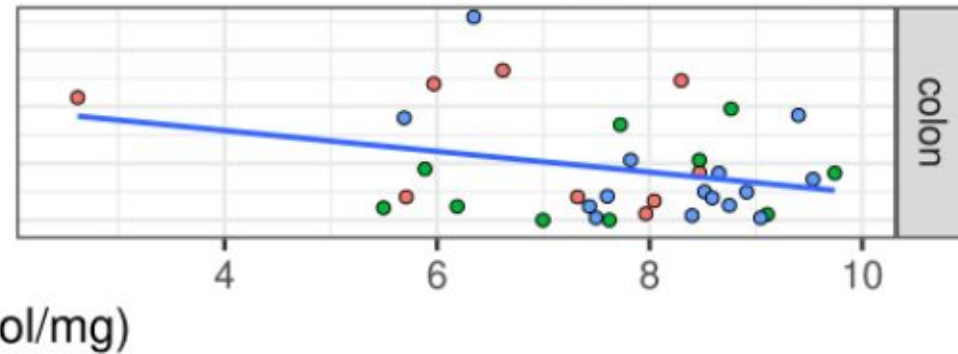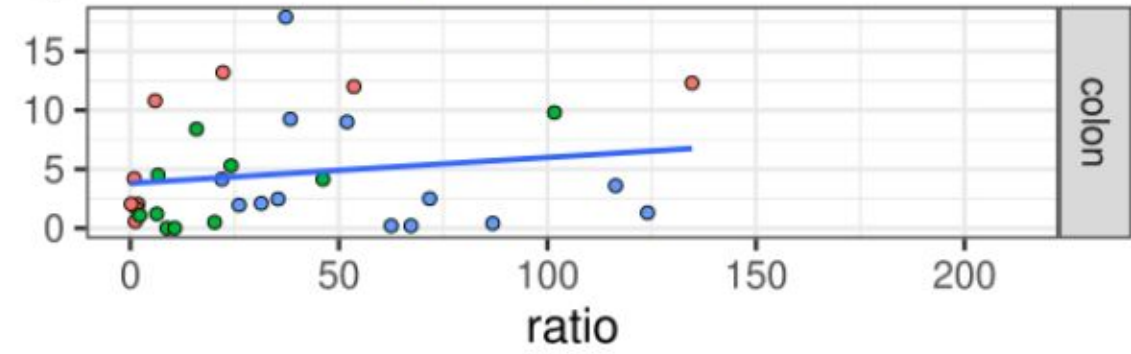

diet ● chow ● LF/LF ● WD

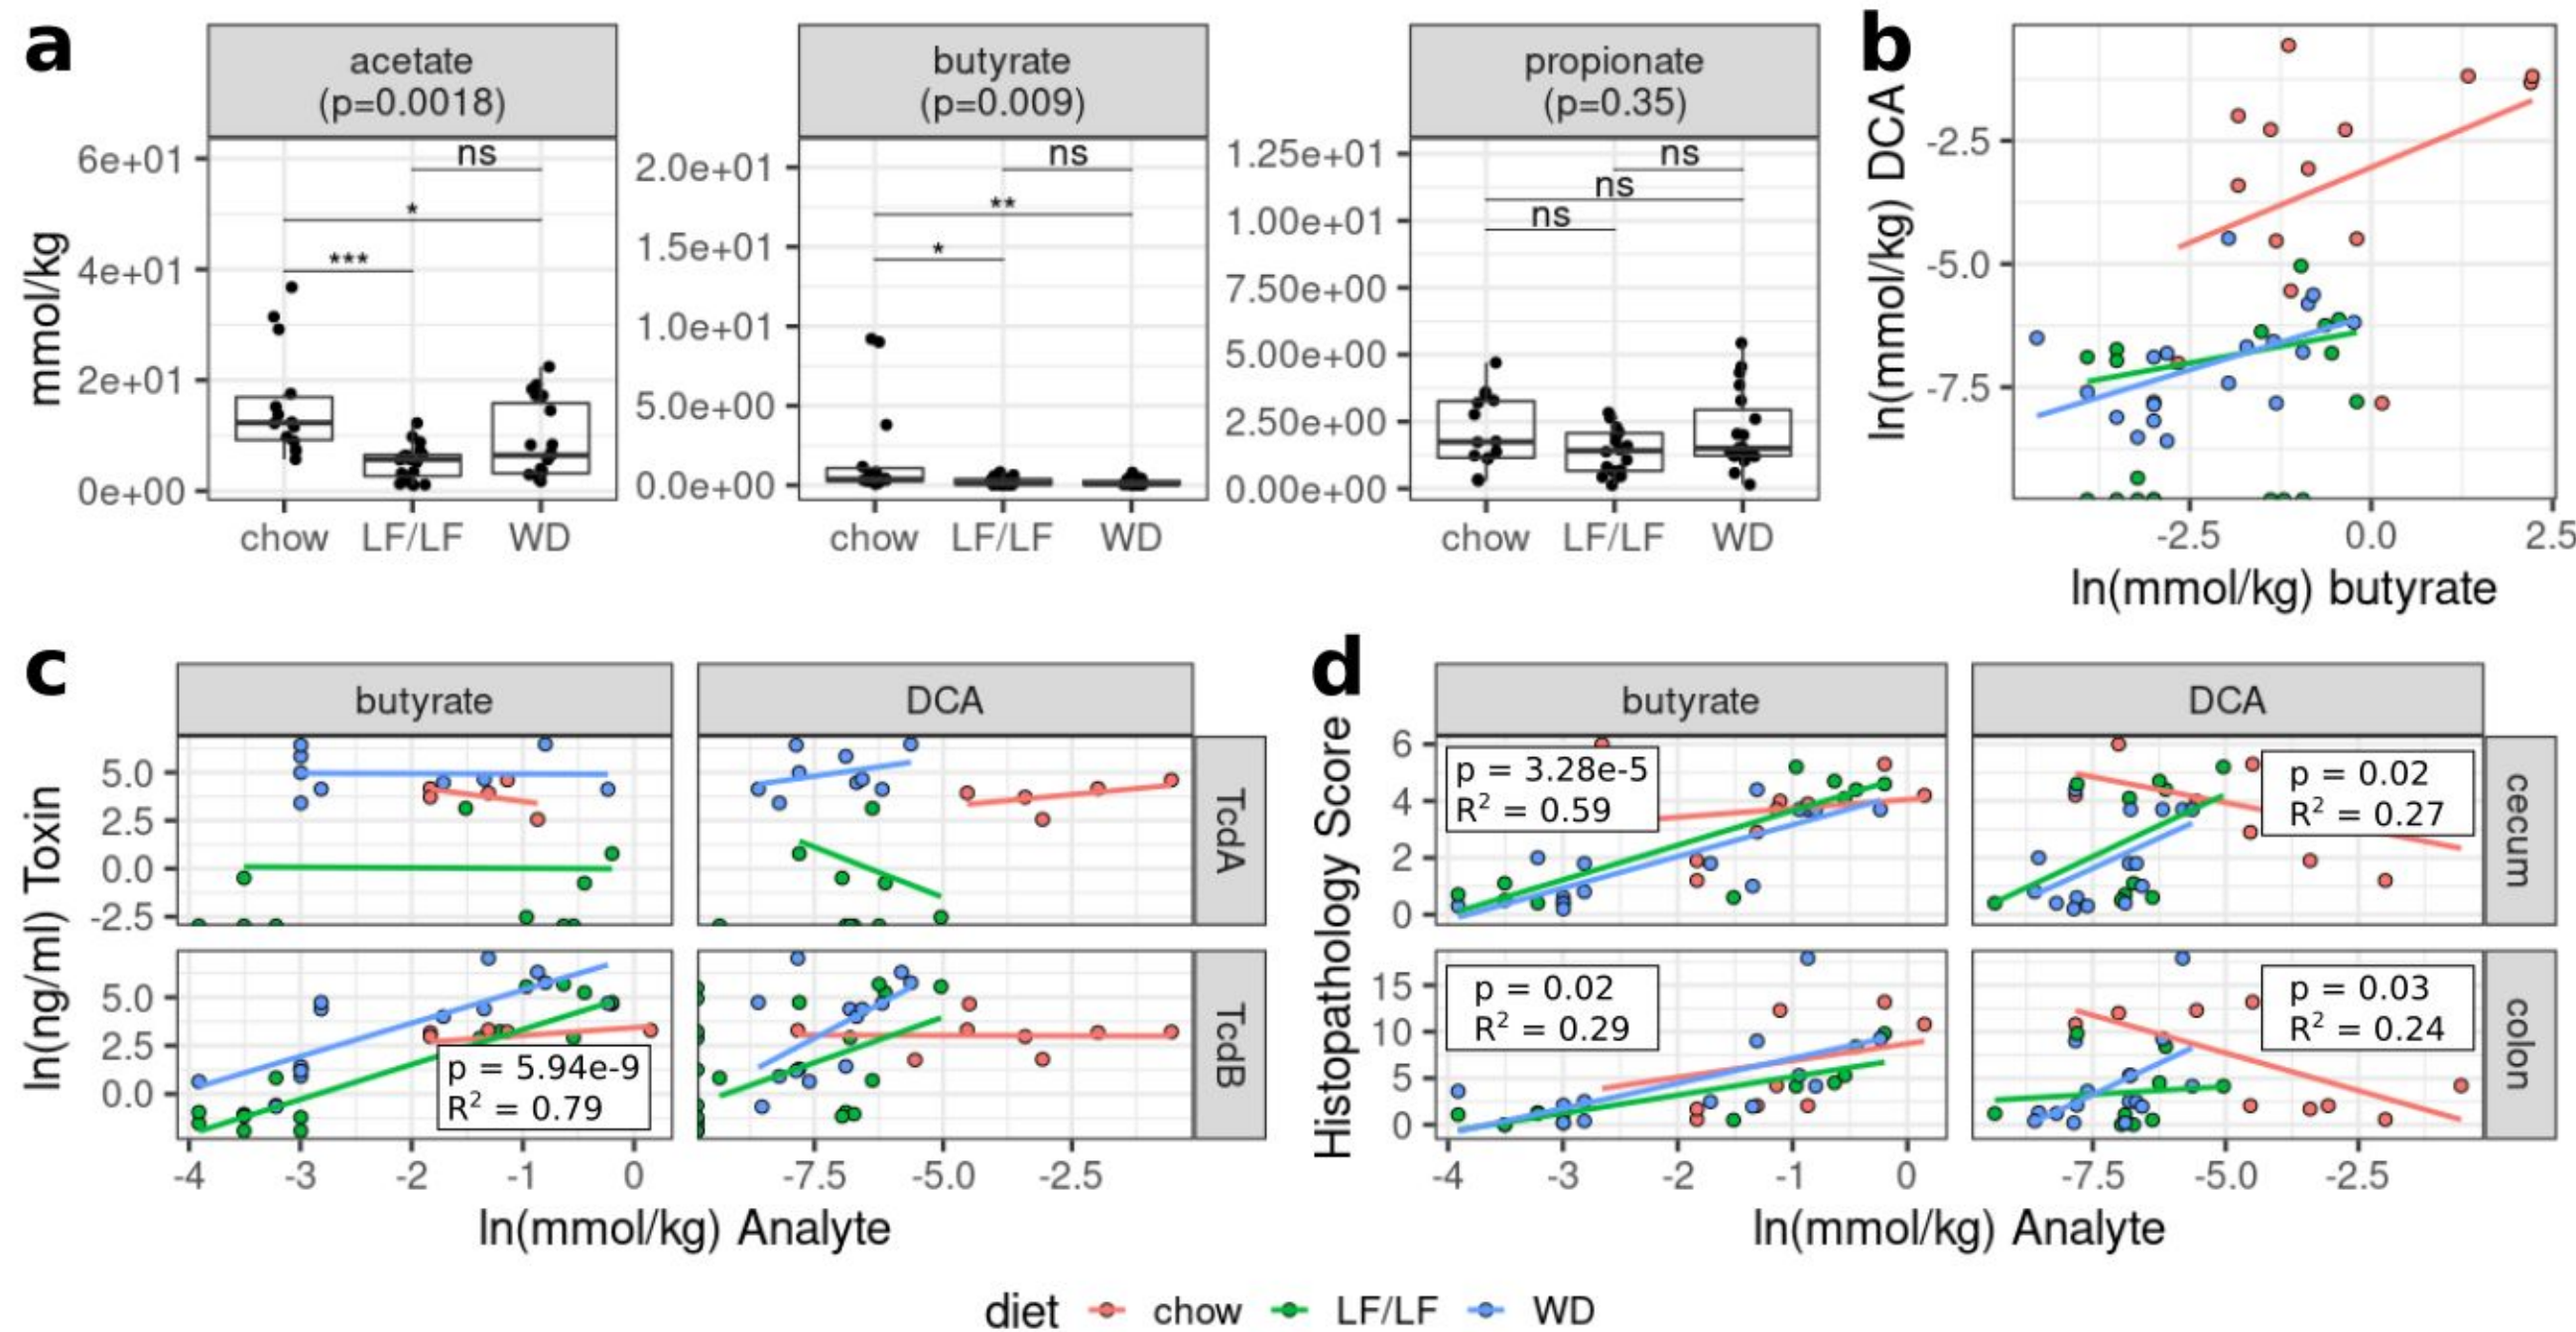

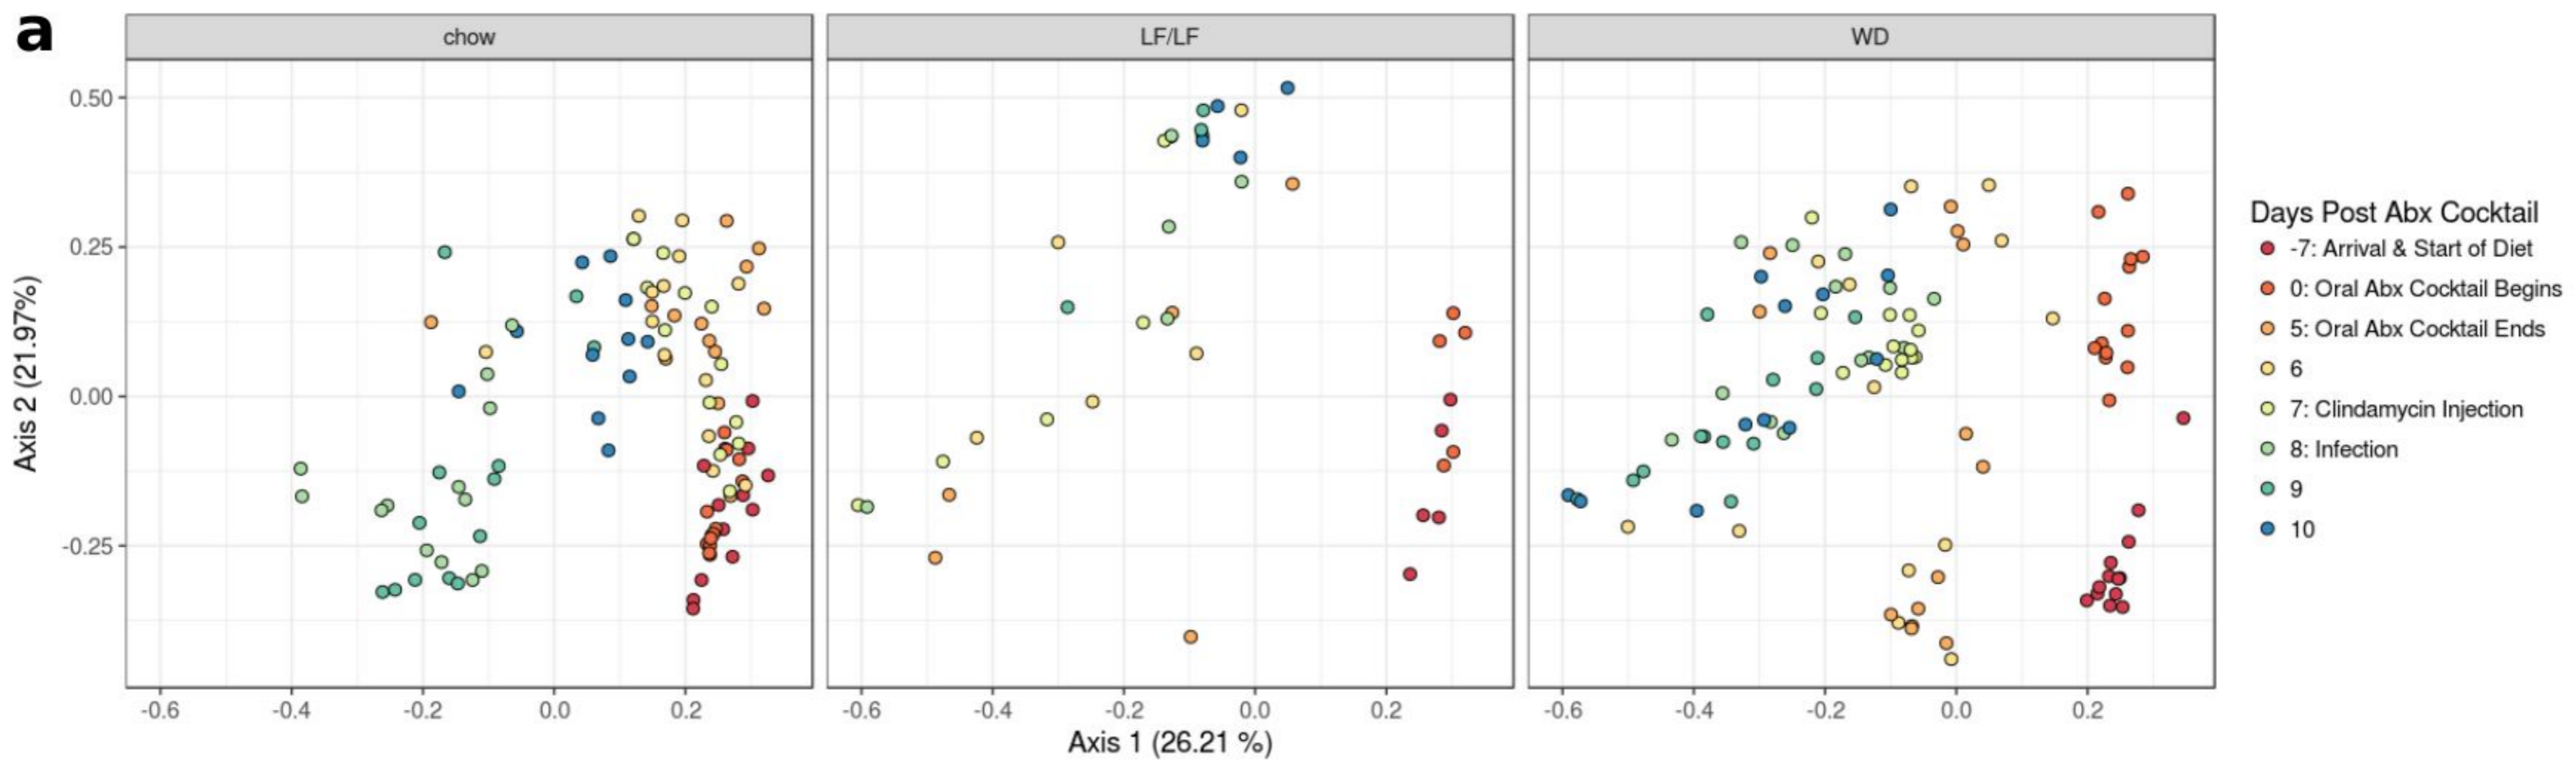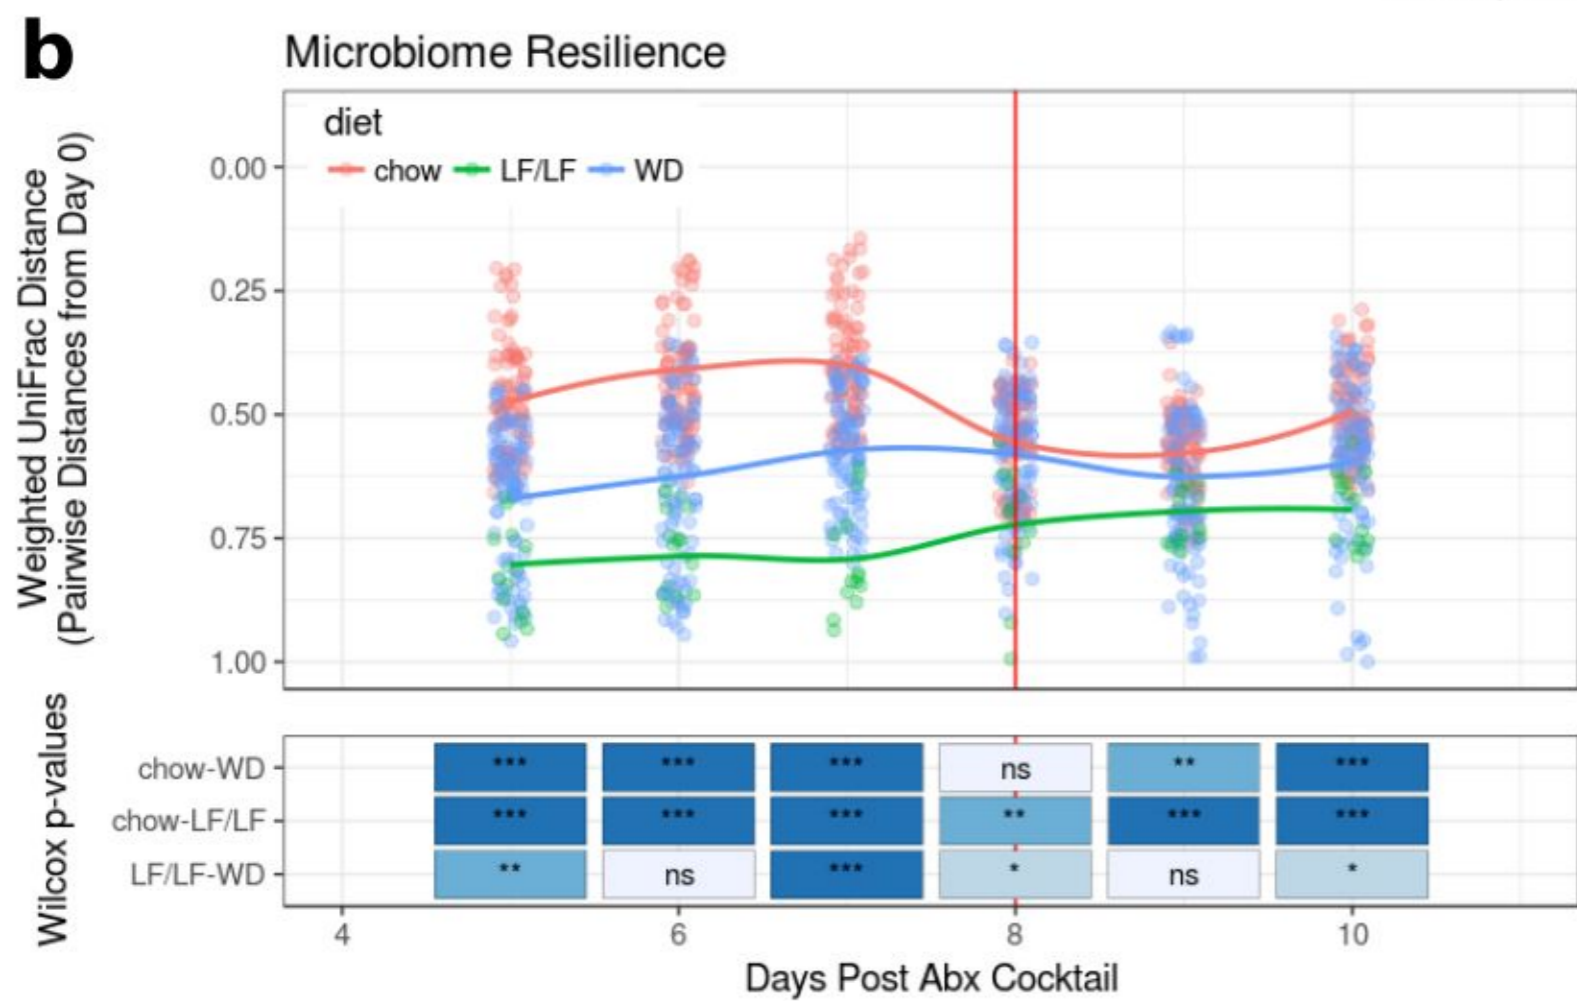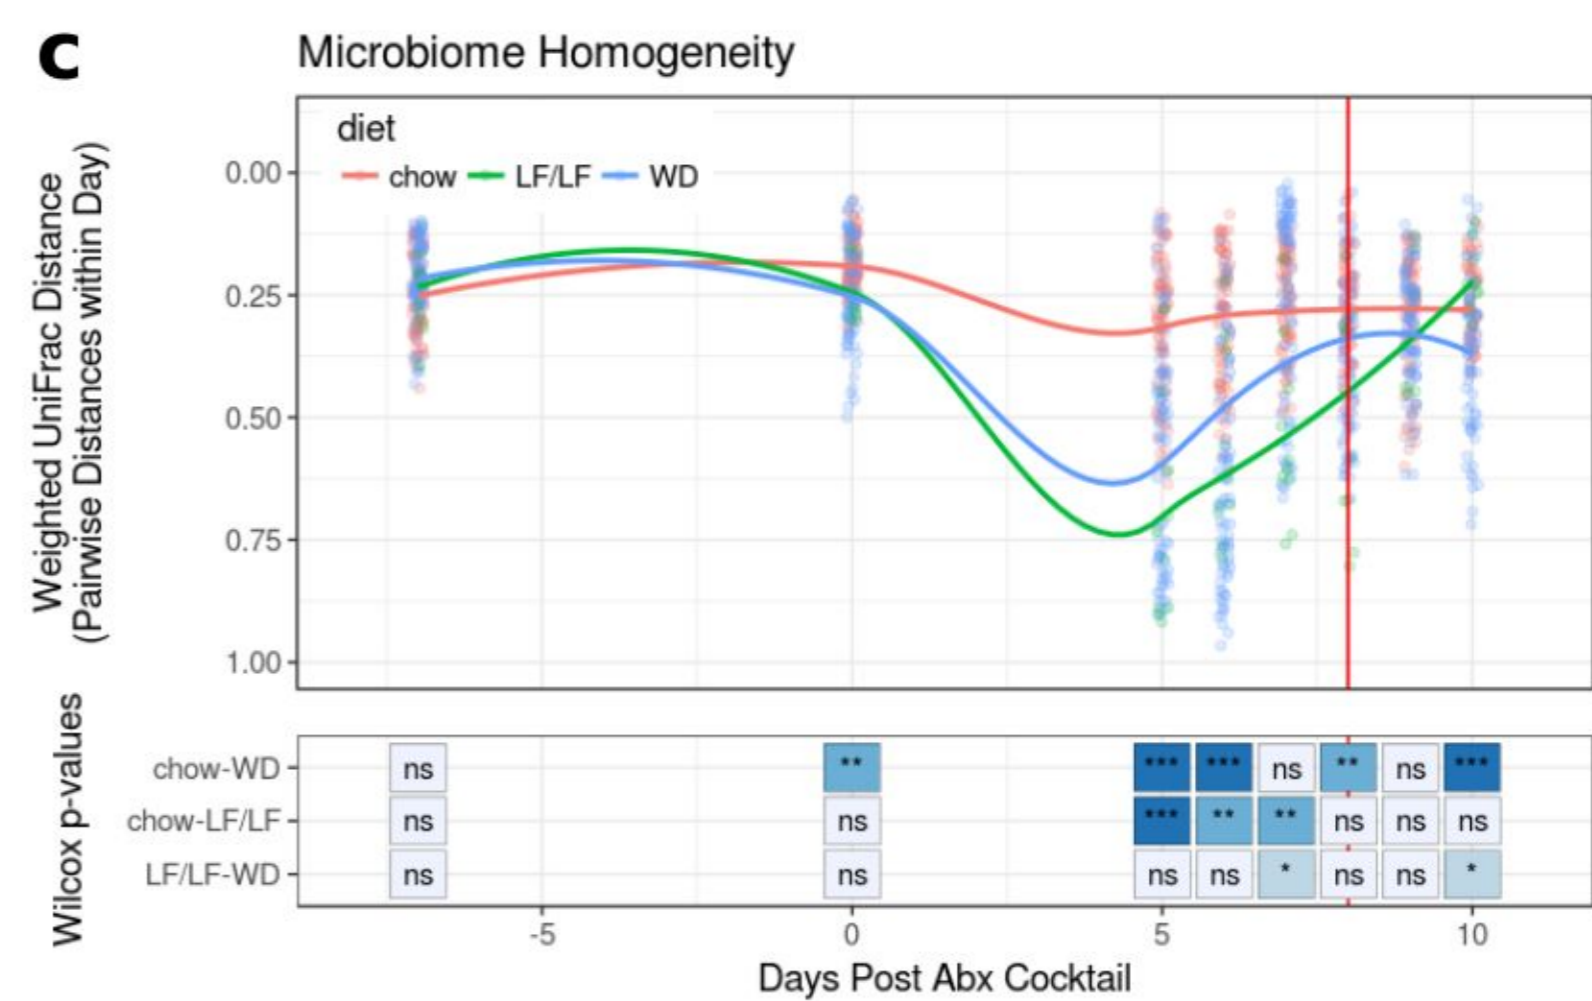

## Alpha Diversity

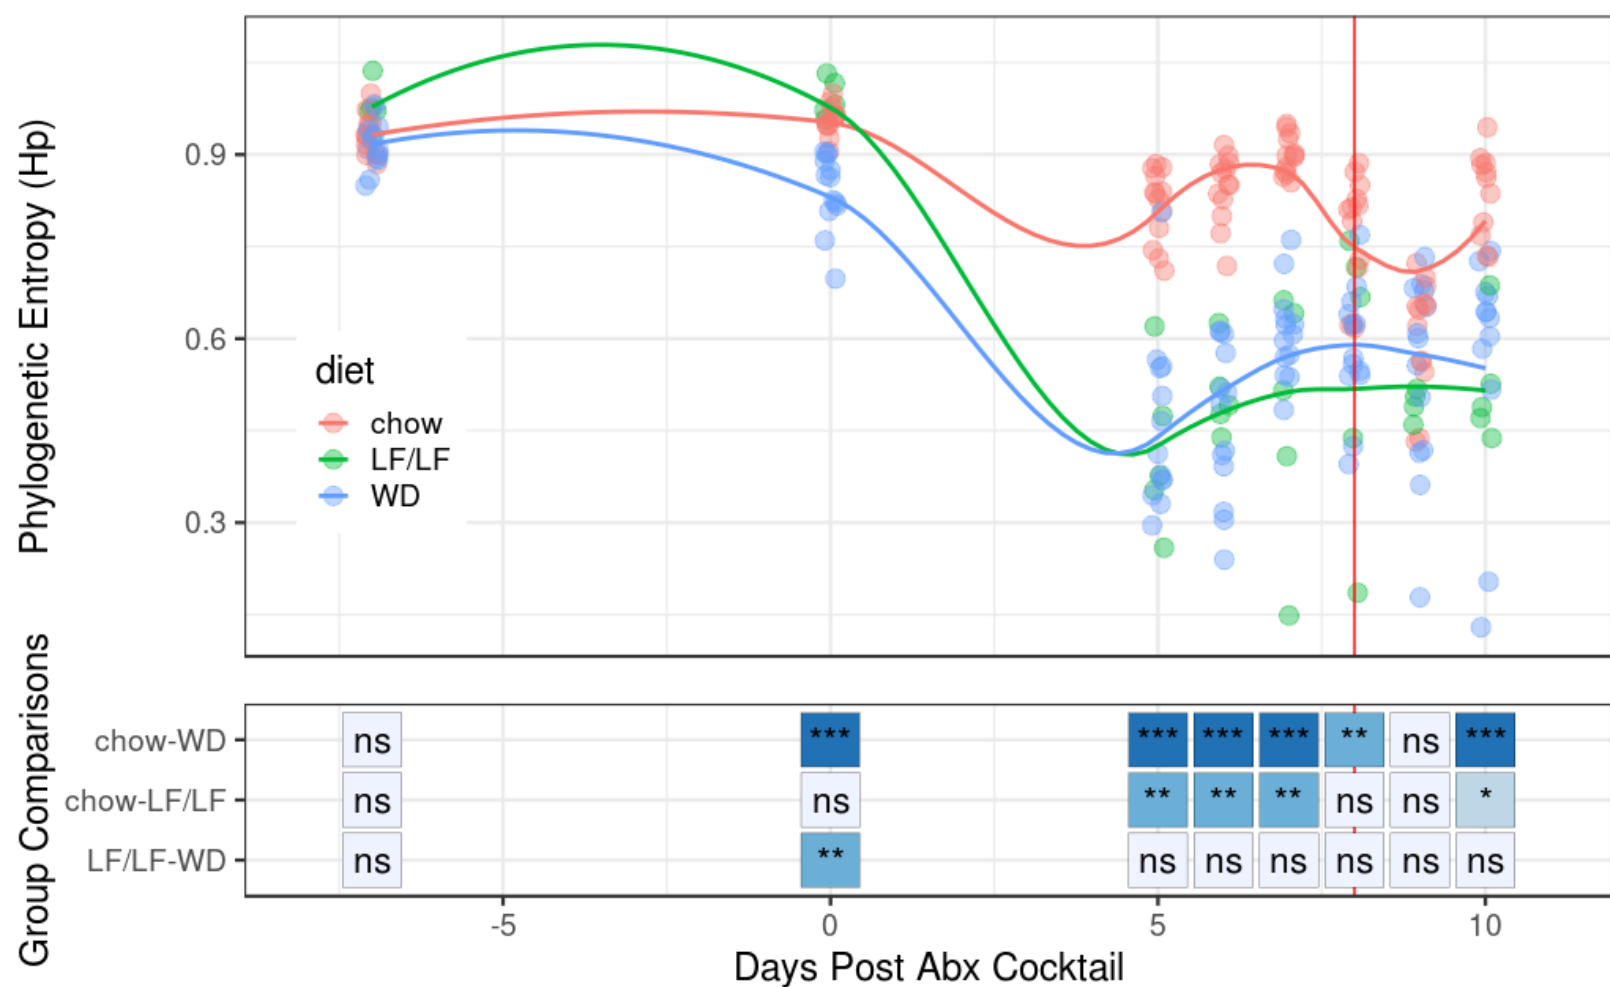

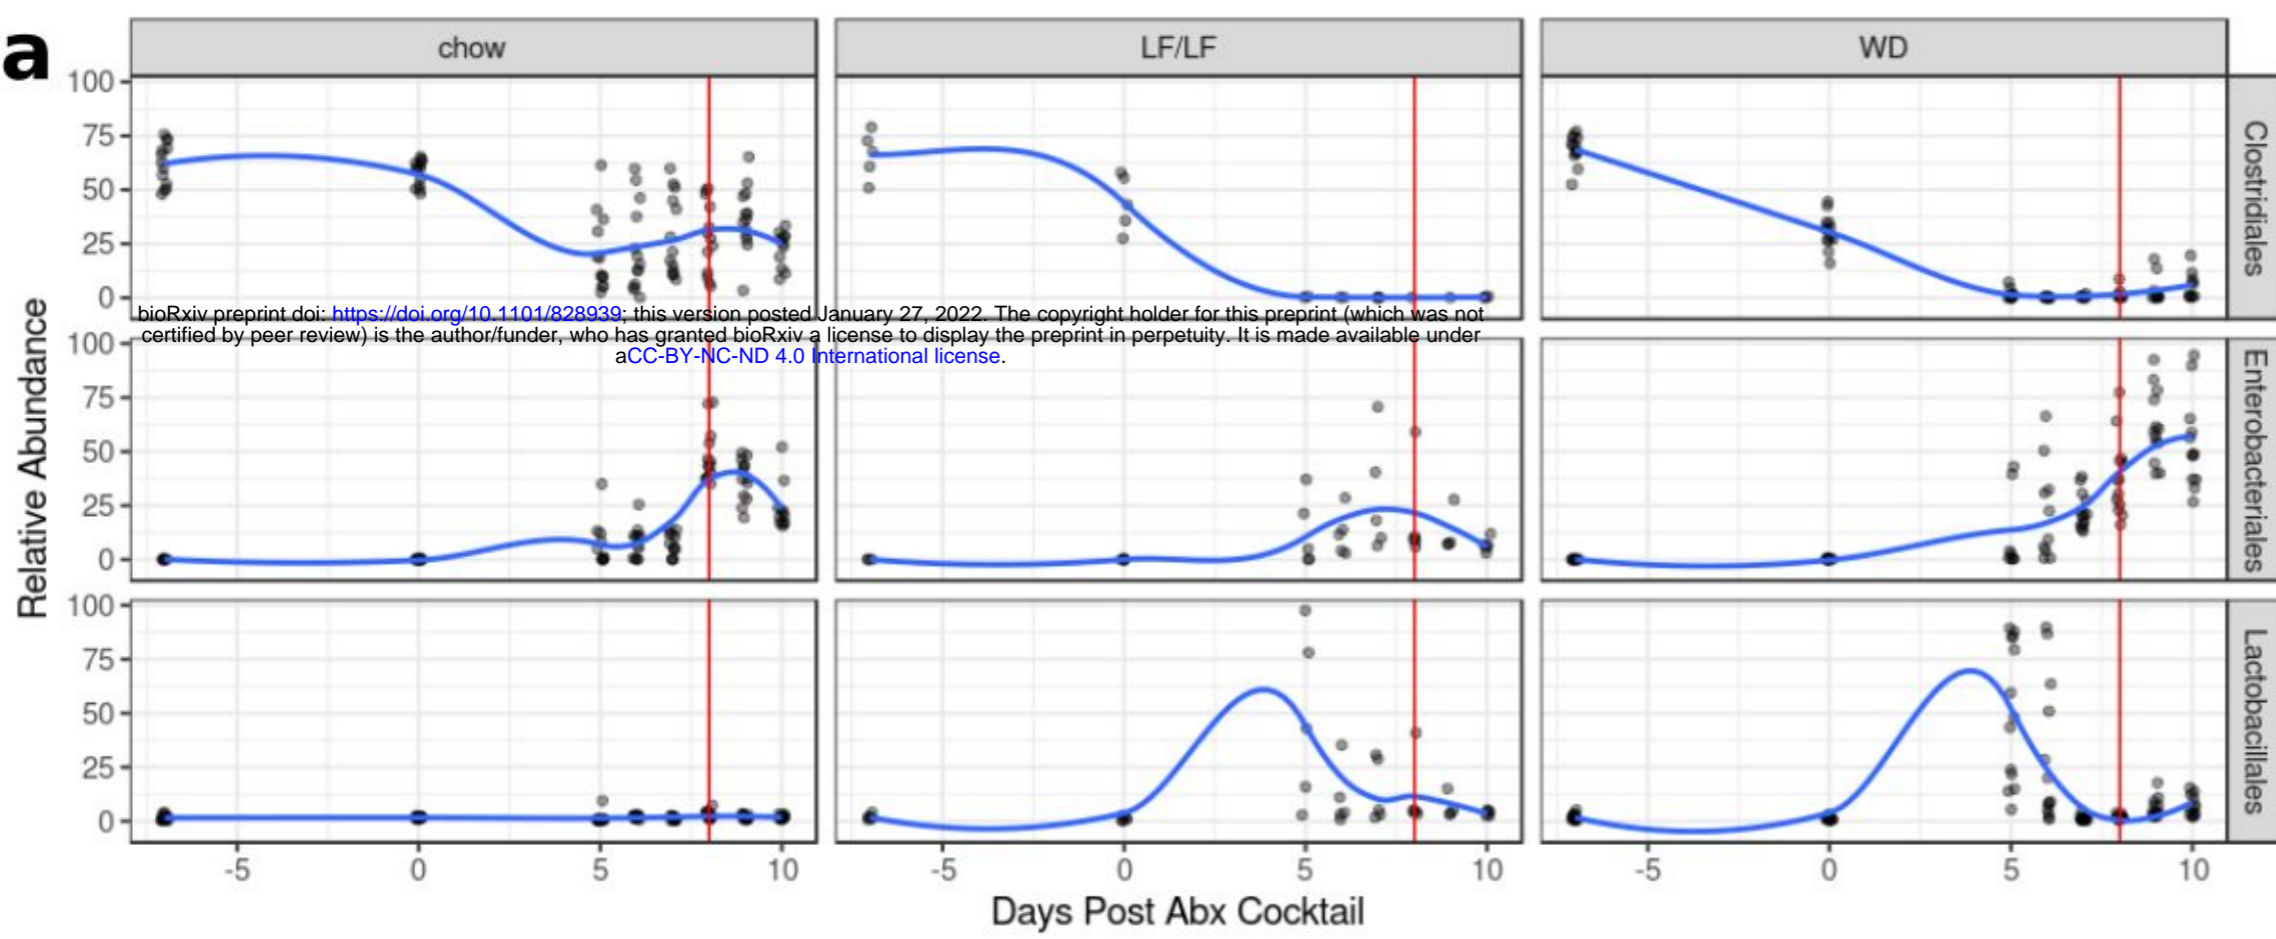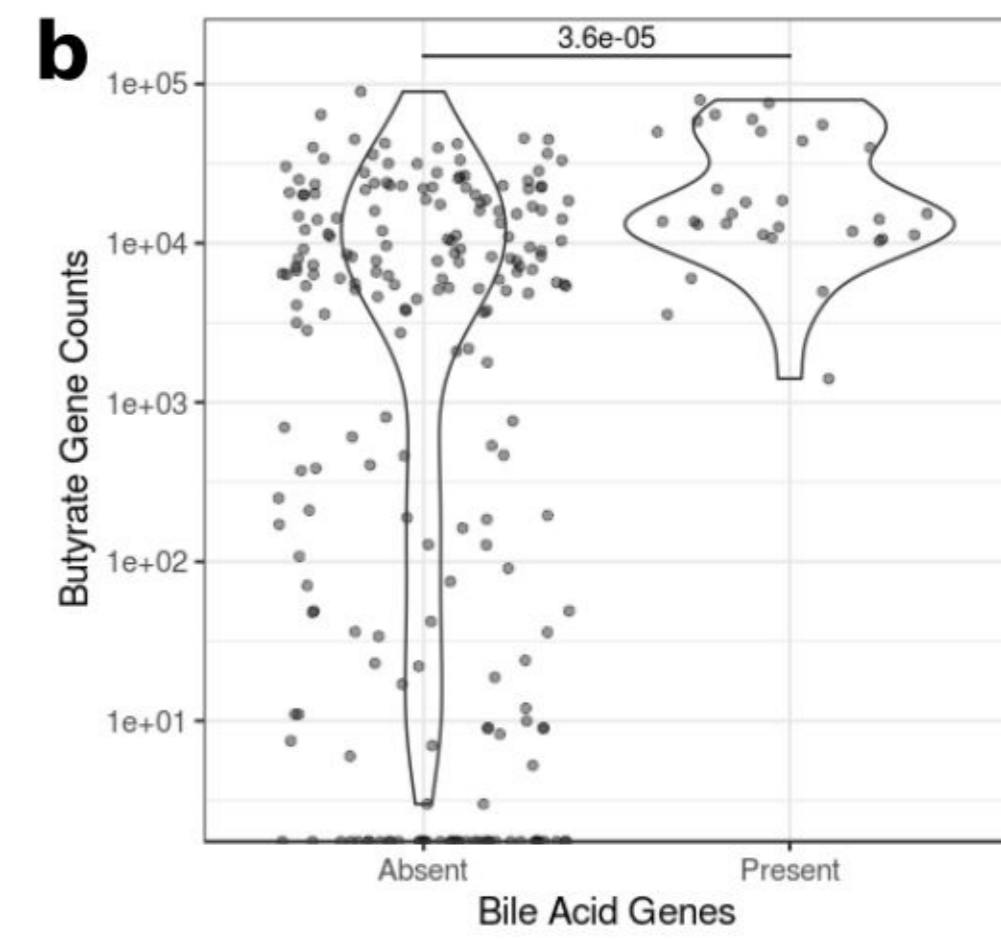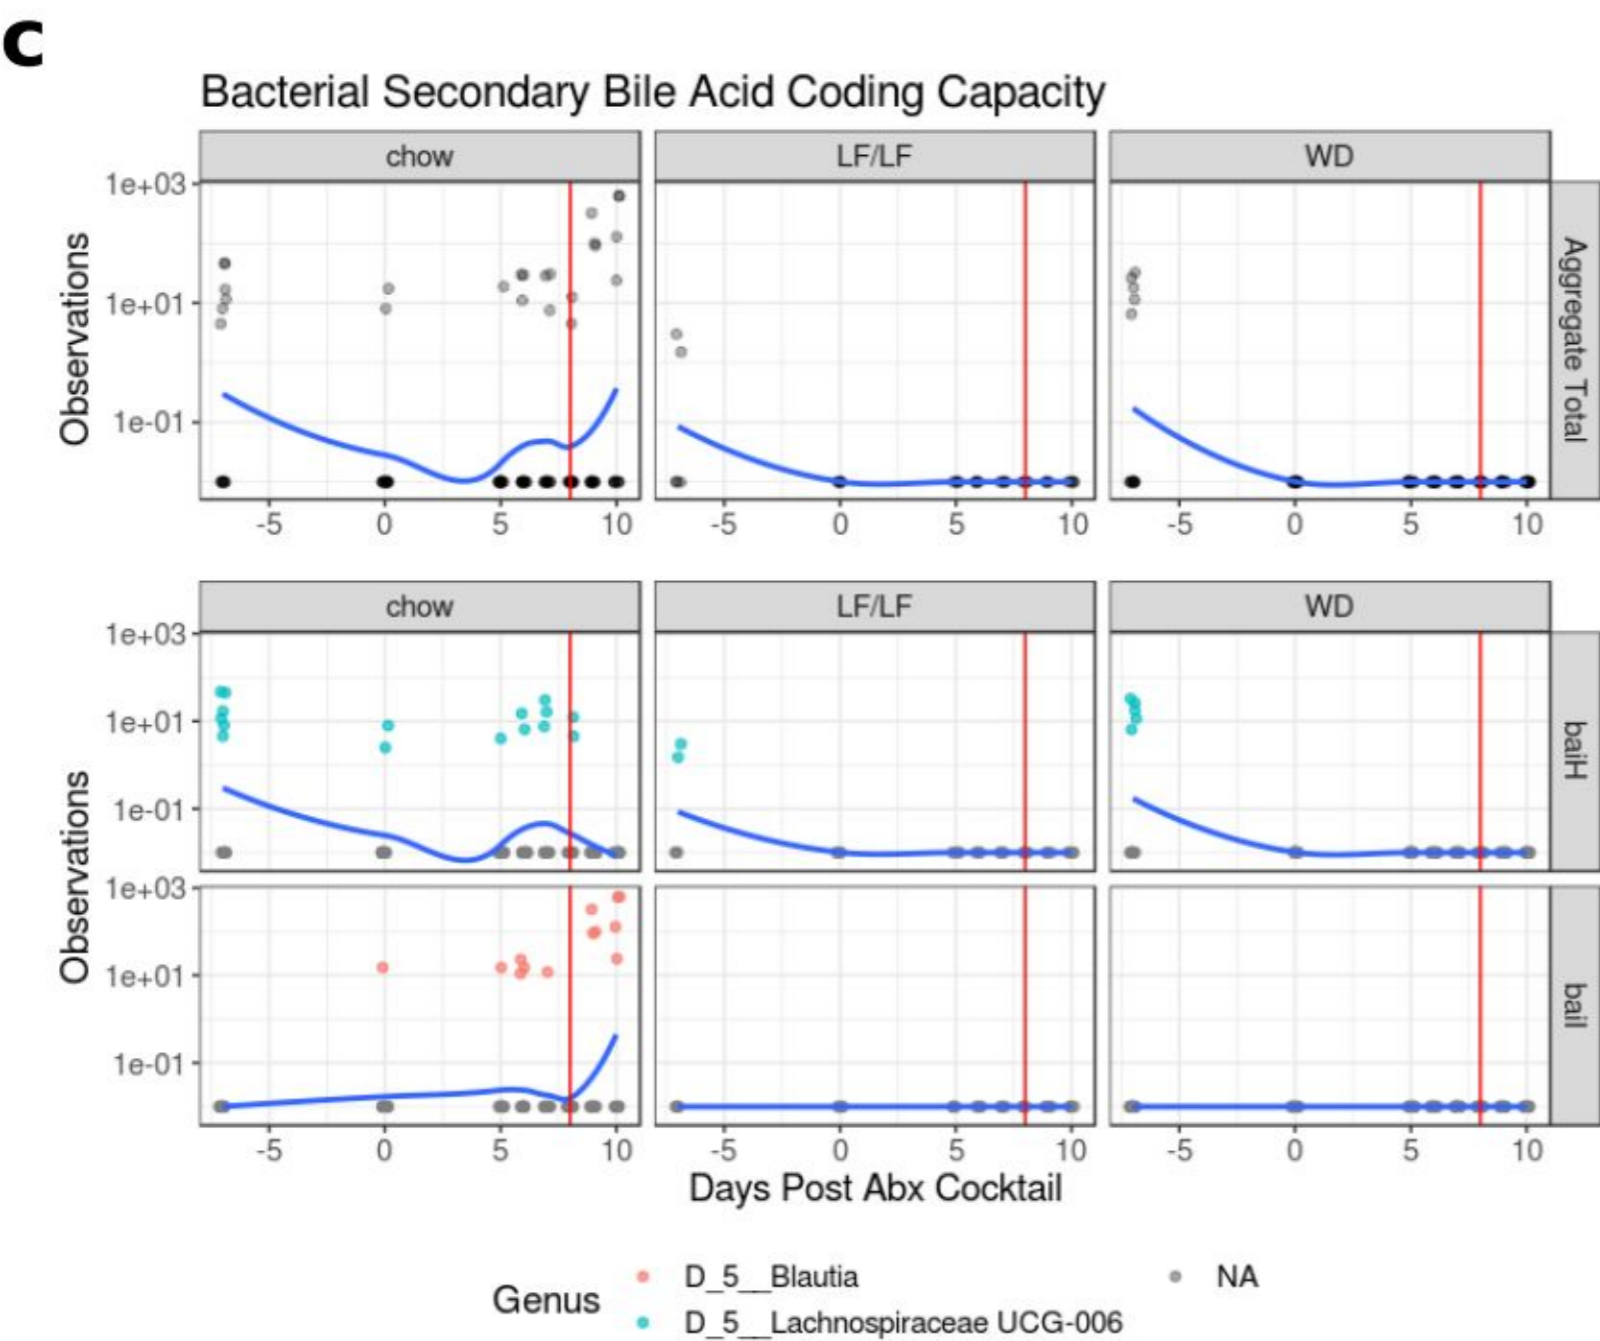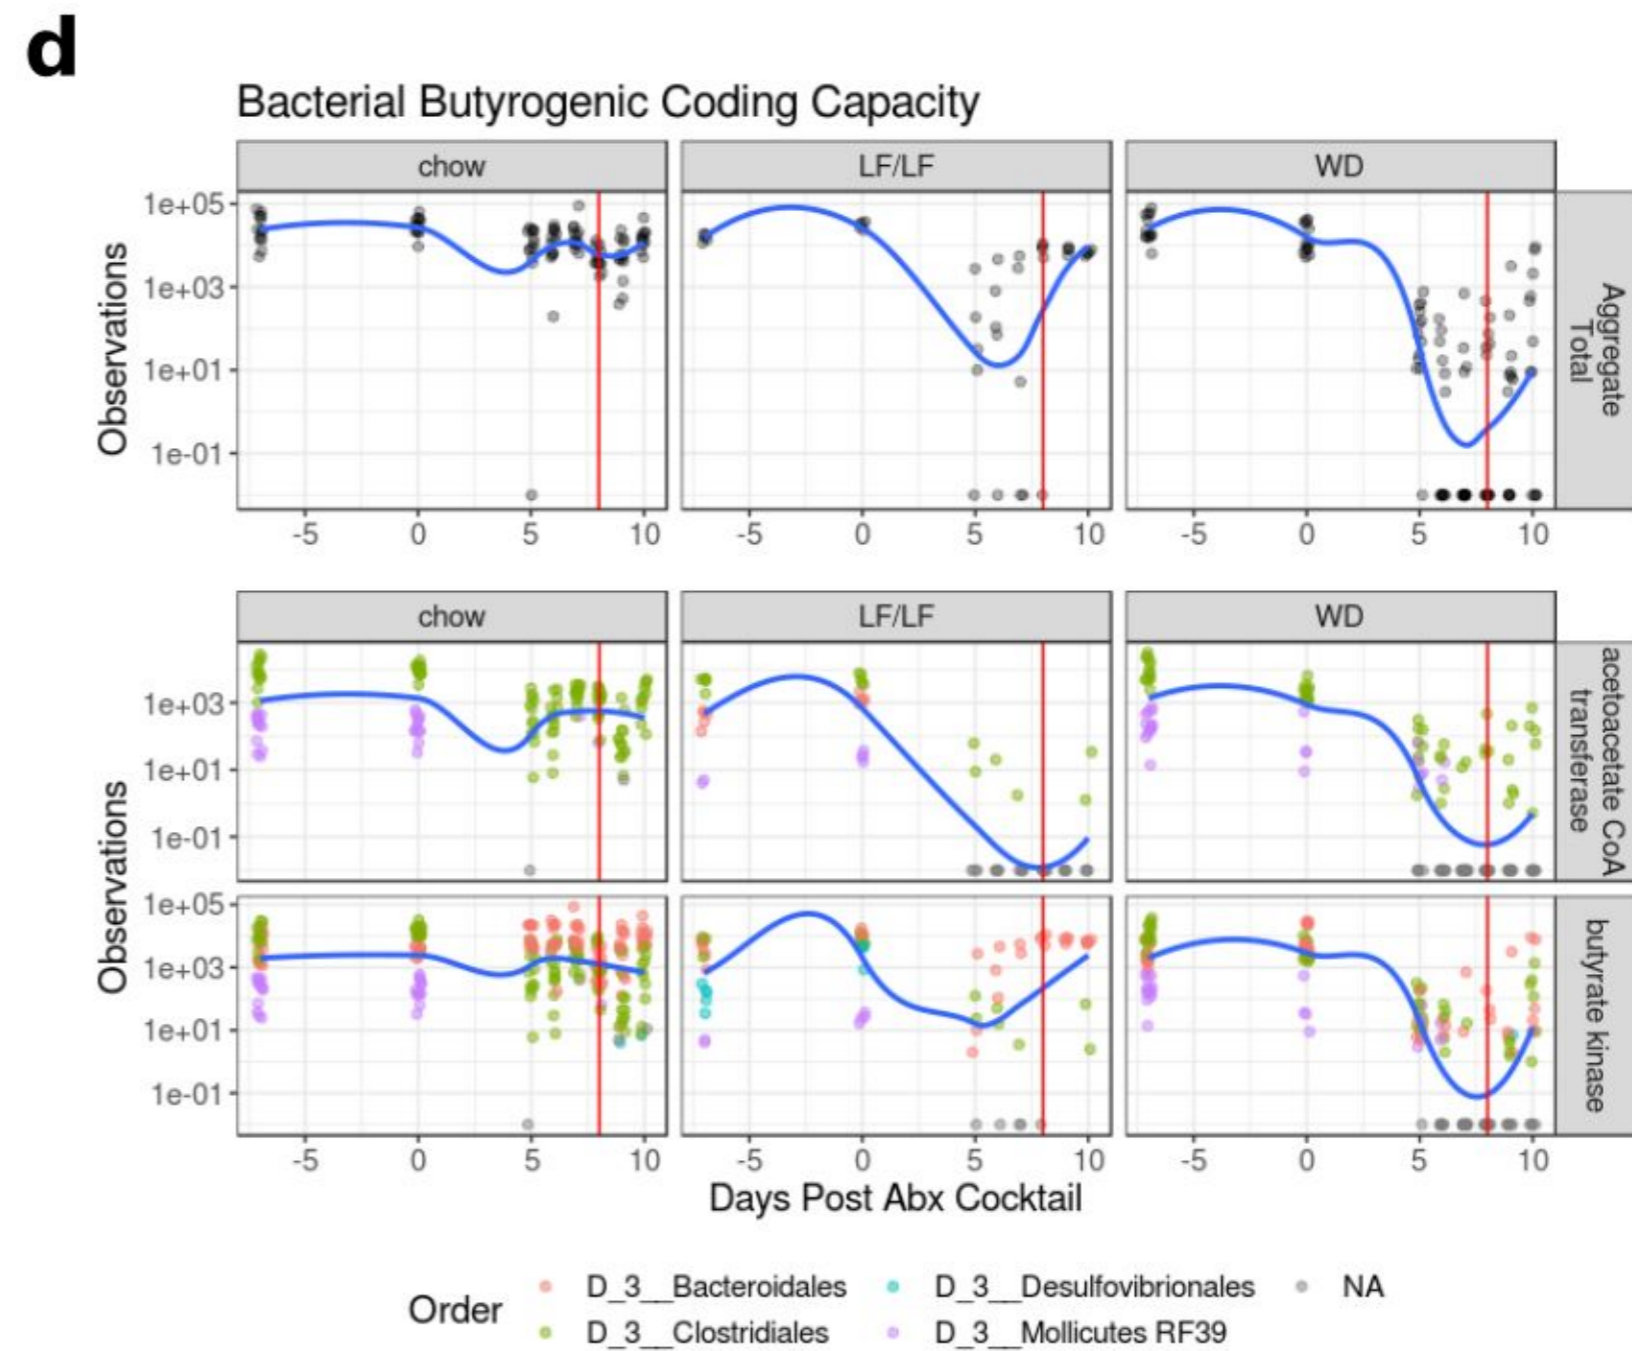

Source: https://www.biorxiv.org/content/10.1101/828939v4.full.pdf
